# Supplementary material for: Recyclable copper catalyzed nitrogenation of biphenyl halides: a direct approach to carbazoles
Source: Royal Society of Chemistry journal article supplement (doi:10.1039/c3cc41443d), 2013-01-01

# Recyclable Copper Catalyzed Nitrogenation of Biphenyl Halides: A Direct Approach to Carbazole

## (Supporting Information)

Yang Ou,<sup>†</sup> and Ning Jiao<sup>\*,†,§</sup>

<sup>†</sup>State Key Laboratory of Natural and Biomimetic Drugs, Peking University, Xue Yuan Rd. 38, Beijing 100191, China, <sup>§</sup>State key Laboratory of Drug Research, Chinese Academy of Sciences, Shanghai 201203, China.

### Table of Contents

|                                                                 |         |
|-----------------------------------------------------------------|---------|
| General remarks                                                 | S2      |
| Screening of different reaction conditions                      | S3      |
| Figure of Some biologically active molecules or medicines.      | S3      |
| Experimental procedure and characterization data                | S4-S12  |
| References                                                      | S12     |
| <sup>1</sup> H NMR and <sup>13</sup> C NMR spectra for products | S13-S40 |

## General remarks

All manipulations were conducted with schlenk tubes.  $^1\text{H}$ -NMR spectra were recorded on a Bruker AVIII-400 spectrometers. Chemical shifts (in ppm) were calibrated with  $\text{CDCl}_3$  and  $\text{DMSO-d}_6$ .  $^{13}\text{C}$ -NMR spectra were obtained by using the same NMR spectrometers and were calibrated with  $\text{CDCl}_3$  and  $\text{DMSO-d}_6$ . Unless otherwise noted, materials obtained from commercial suppliers were used without further purification. The starting materials **1** and A21-CuI were prepared according to previously reported literatures.<sup>1,2</sup>

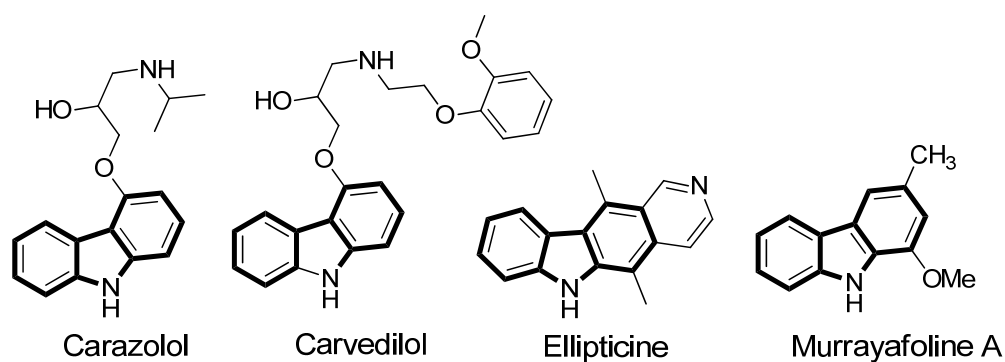

**Figure S1.** Some biologically active molecules or medicines.

**Table S1 Optimization of reaction conditions for nitrogenation of biphenyl halides **2a**.<sup>a</sup>**

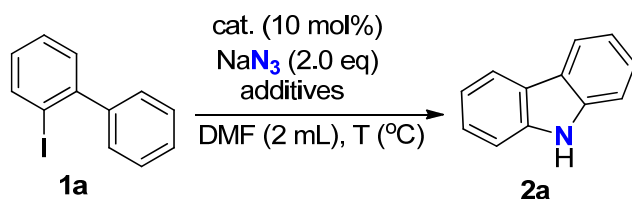

| entry           | catalyst                                                                                | temperature | additives                       | solvent   | yield (%) <sup>b</sup> |
|-----------------|-----------------------------------------------------------------------------------------|-------------|---------------------------------|-----------|------------------------|
| 1               | none                                                                                    | 100         |                                 | DMSO      | 0                      |
| 2 <sup>c</sup>  | CuI                                                                                     | 100         | NaOH                            | DMSO      | trace                  |
| 3 <sup>c</sup>  | CuI                                                                                     | 100         | NaOH, PEG-400                   | DMSO      | trace                  |
| 4               | A21-CuI                                                                                 | 100         |                                 | DMF       | 34                     |
| 5               | A21-CuI                                                                                 | 100         |                                 | toluene   | 0                      |
| 6               | A21-CuI                                                                                 | 130         |                                 | DMF       | 55                     |
| 7 <sup>d</sup>  | CuI                                                                                     | 130         |                                 | DMF       | 53                     |
| 9               | Pd(OAc) <sub>2</sub>                                                                    | 130         |                                 | DMF       | 0                      |
| 10              | Rh(O <sub>2</sub> CC <sub>7</sub> H <sub>15</sub> ) <sub>4</sub>                        | 130         |                                 | DMF       | 0                      |
| 11              | RuCl <sub>3</sub>                                                                       | 130         |                                 | DMF       | 0                      |
| 12              | Rh(O <sub>2</sub> CC <sub>7</sub> H <sub>15</sub> ) <sub>4</sub> , A <sub>21</sub> -CuI | 130         |                                 | DMF       | 53                     |
| 13              | A21-CuI                                                                                 | 130         |                                 | NMP       | 57                     |
| 14              | A21-CuI                                                                                 | 130         |                                 | p-xylene  | 0                      |
| 15              | A21-CuI                                                                                 | 130         |                                 | DMF, PhCl | 57                     |
| 16              | A21-CuI, Pd(PPh <sub>3</sub> ) <sub>4</sub>                                             | 130         |                                 | DMF       | 32                     |
| 17              | A <sub>21</sub> -CuI                                                                    | 130         | NaNO <sub>2</sub>               | DMF       | 60                     |
| 18              | A <sub>21</sub> -CuI                                                                    | 150         |                                 | DMF       | 61                     |
| 19              | A <sub>21</sub> -CuI                                                                    | 150         | 4Å MS, NaNO <sub>2</sub>        | DMF       | 65                     |
| 20              | A21-CuI                                                                                 | 130         | Na <sub>2</sub> CO <sub>3</sub> | DMF       | 43                     |
| 21              | A21-CuI                                                                                 | 130         | AlCl <sub>3</sub>               | DMF       | 0                      |
| 22              | A21-CuI                                                                                 | 130         | FeCl <sub>2</sub>               | DMF       | trace                  |
| 23 <sup>e</sup> | A21-CuI                                                                                 | 130         |                                 | DMF       | 0                      |
| 24 <sup>f</sup> | A21-CuI                                                                                 | 130         |                                 | DMF       | 0                      |

<sup>a</sup> Reaction conditions: **1a** (0.5 mmol), sodium azide (1.0 mmol), additives, catalyst (10 mol %), in dry DMF (2.0 mL) under Ar for 48 h. <sup>b</sup> Isolated yields. <sup>c</sup> L-proline was added as a ligand. <sup>d</sup> Phen was added as a ligand. <sup>e</sup> TMSN<sub>3</sub> was added instead of NaN<sub>3</sub>. <sup>f</sup> TosN<sub>3</sub> was added instead of NaN<sub>3</sub>.

## Experimental procedure and characterization data

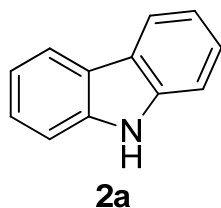

### 1) 9H-Carbazole (**2a**)<sup>3</sup>

#### Typical procedure:

The reaction of 2-iodo-1,1'-biphenyl (**1a**) (0.5 mmol, 140 mg), A21-CuI (0.025 mmol, 20mg), NaN<sub>3</sub> (1.0 mmol, 65 mg), 4 Å MS (100 mg) were stirred in 2 mL dry DMF at 150 °C under argon for 48 h. The resulting mixture was filtered, concentrated and purified by flash chromatography on silica gel (eluent: petroleum ether/ethyl acetate = 10:1) to afford 54.6 mg (65%) of **2a** as solid: <sup>1</sup>H NMR (DMSO, 400 MHz): δ = 11.29 (s, 1H), 8.12 (d, *J* = 7.6 Hz, 2H), 7.53 (d, *J* = 8 Hz, 2H), 7.43-7.38 (m, 2H), 7.20-7.14 (m, 2H); <sup>13</sup>C NMR (DMSO, 100 MHz): δ = 140.2, 126.0, 122.9, 120.6, 119.0, 111.4 ppm; IR (neat): ν = 3479, 2250, 1242, 823, 761, 624 cm<sup>-1</sup>. MS (70 eV): *m/z* (%) 167.0 (M<sup>+</sup>,100).

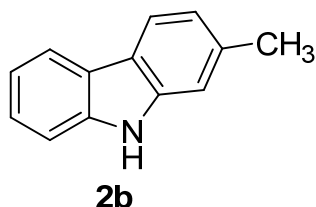

### 2) 2-Methyl-9H-carbazole (**2b**)<sup>3</sup>

The reaction of 2-iodo-4'-methyl-1,1'-biphenyl (**1b**) (0.5 mmol, 147 mg), A21-CuI (0.025 mmol, 20mg), NaN<sub>3</sub> (1.0 mmol, 65 mg), 4 Å MS (100 mg) in 2 mL dry DMF at 150 °C under argon for 48 h afforded 75.3 mg (83%) of **2b** as solid: <sup>1</sup>H NMR (DMSO, 400 MHz): δ = 11.14 (s, 1H), 8.05 (d, *J* = 8.0 Hz, 1H), 7.97 (d, *J* = 7.6 Hz, 1H), 7.49 (d, *J* = 8.0 Hz, 1H), 7.38-7.34 (m, 1H), 7.32 (s, 1H), 7.14 (t, *J* = 7.4 Hz, 1H), 7.00 (d, *J* = 8.0 Hz, 1H), 2.50(s, 3H); <sup>13</sup>C NMR (DMSO, 100 MHz): δ = 140.7, 140.2, 135.5, 125.4, 123.0, 120.7, 120.5, 120.3, 120.2, 118.9, 111.4, 111.3, 22.2; IR (thin film): 3467, 2251, 1658, 1243, 823, 761, 625 cm<sup>-1</sup>; MS (70 eV): *m/z* (%) 181.1 (M<sup>+</sup>,100).

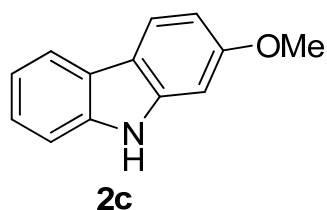

### 3) 2-Methoxy-9H-carbazole (**2c**)<sup>3</sup>

The reaction of 2-iodo-4'-methoxy-1,1'-biphenyl (**1c**) (0.5 mmol, 155 mg), A21-CuI (0.025 mmol, 20mg), NaN<sub>3</sub> (1.0 mmol, 65 mg), 4 Å MS (100 mg) were stirred in 2 mL dry DMF at 150 °C under argon for 48 h afforded 79 mg (80%) of **2c** as solid: <sup>1</sup>H NMR (DMSO, 400 MHz): δ = 11.14 (s, 1H), 8.00-7.95 (m, 2H), 7.46 (d, *J* = 8.0 Hz, 1H), 7.33-7.29 (m, 1H), 7.15-7.11 (m, 1H), 7.01 (d, *J* = 2.0 Hz, 1H), 6.79 (dd, *J*<sub>1</sub> = 2.0 Hz, *J*<sub>2</sub> = 8.8 Hz, 1H), 3.85 (s, 3H); <sup>13</sup>C NMR (DMSO, 100 MHz): δ = 159.0, 141.6, 140.2, 124.6, 123.2, 121.4, 119.7, 119.0, 116.7, 111.1, 108.2, 94.9, 55.7; IR (thin film): 3432, 2251, 1632, 1463, 823, 761, 625 cm<sup>-1</sup>; MS (70 eV): *m/z* (%) 197.1 (M<sup>+</sup>,100).

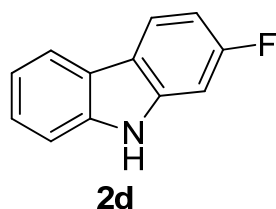

### 4) 2-Fluoro-9H-carbazole (**2d**)<sup>3</sup>

The reaction of 4'-fluoro-2-iodo-1,1'-biphenyl (**1d**) (0.5 mmol, 149 mg), A21-CuI (0.025 mmol, 20mg), NaN<sub>3</sub> (1.0 mmol, 65 mg), 4 Å MS (100 mg) were stirred in 2 mL dry DMF at 150 °C under argon for 48 h afforded 57.3 mg (62%) of **2d** as solid: <sup>1</sup>H NMR (DMSO, 400 MHz): δ = 11.40 (s, 1H), 8.18-8.06 (m, 2.0 H), 7.50 (d, *J* = 8.0 Hz, 1H), 7.37 (t, *J* = 7.4 Hz, 1H), 7.28 (dd, *J*<sub>1</sub> = 2.0 Hz, *J*<sub>2</sub> = 10.0 Hz, 1H), 7.17 (t, *J* = 7.4 Hz, 1H), 7.10-6.80 (m, 1H); <sup>13</sup>C NMR (DMSO, 100 MHz): δ = 161.6 (d, *J* = 23.7 Hz), 140.8 (*J* = 1.20 Hz), 125.7, 122.5, 121.9 (d, *J* = 1.12 Hz), 120.4, 119.5 (d, *J* = 2.15 Hz), 111.5, 106.9 (d, *J* = 2.41 Hz), 97.8 (d, *J* = 2.58 Hz); IR (thin film): 3457, 2250, 1462, 823, 761 cm<sup>-1</sup>; MS (70 eV): *m/z* (%) 185.1 (M<sup>+</sup>,100).

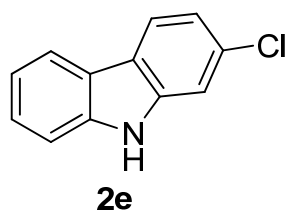

### 5) 2-Chloro-9H-carbazole (**2e**)<sup>4</sup>

The reaction of 4'-chloro-2-iodo-1,1'-biphenyl (**1e**) (0.5 mmol, 157 mg), A21-CuI (0.025 mmol, 20mg), NaN<sub>3</sub> (1.0 mmol, 65 mg), 4 Å MS (100 mg) were stirred in 2 mL dry DMF at 150 °C under argon for 48 h afforded 55.6 mg (55%) of **2e** as solid: <sup>1</sup>H NMR (DMSO, 400 MHz): δ = 11.41 (s, 1H), 8.11 (d, *J* = 8.4 Hz, 2H), 7.54-7.51 (m, 2H), 7.45-7.39 (m, 1H), 7.21-7.16 (m, 2H); <sup>13</sup>C NMR (DMSO, 100 MHz): δ = 140.8, 140.6, 130.3, 126.4, 122.3, 122.0, 121.8, 120.8, 119.6, 119.1, 111.7, 111.1; IR (thin film): 3457, 2250, 1462, 823, 761 cm<sup>-1</sup>; MS (70 eV): *m/z* (%) 201.0 (M<sup>+</sup>,100).

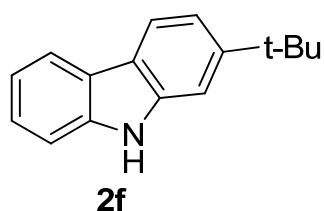

### 6) 2-(Tert-butyl)-9H-carbazole (**2f**)<sup>3</sup>

The reaction of 4'-(tert-butyl)-2-iodo-1,1'-biphenyl (**1f**) (0.5 mmol, 168 mg), A21-CuI (0.025 mmol, 20mg), NaN<sub>3</sub> (1.0 mmol, 65 mg), 4 Å MS (100 mg) were stirred in 2 mL dry DMF at 150 °C under argon for 48 h afforded 89 mg (79%) of **2f** as solid: <sup>1</sup>H NMR (DMSO, 400 MHz): δ = 11.11 (s, 1H), 8.04 (d, *J* = 7.6 Hz, 1H), 7.98 (d, *J* = 8.4 Hz, 1H), 7.50-7.48 (m, 2H), 7.38-7.34 (m, 1H), 7.22 (d, *J* = 8.4 Hz, 1H), 7.14 (t, *J* = 7.6 Hz, 1H); 1.39 (s, 9H); <sup>13</sup>C NMR (DMSO, 100 MHz): δ = 149.0, 140.5, 140.4, 125.4, 122.9, 120.5, 120.3, 120.1, 118.8, 117.0, 111.3, 107.6, 35.2, 32.0; IR (thin film): 3450, 2250, 1659, 1462, 823, 761 cm<sup>-1</sup>; MS (70 eV): *m/z* (%) 223.1 (M<sup>+</sup>,100).

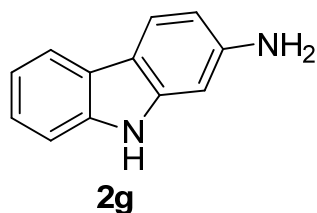

### 13) 9H-Carbazol-2-amine (**2g**)<sup>6</sup>

The reaction of 2'-iodo-[1,1'-biphenyl]-4-amine (**1g**) (0.5 mmol, 147.5 mg), A21-CuI (0.025 mmol, 20mg), NaN<sub>3</sub> (1.0 mmol, 65 mg), 4 Å MS (100 mg) were stirred in 2 mL dry DMF at 150 °C under argon for 48 h afforded 62 mg (68%) of **2g** as solid: <sup>1</sup>H NMR (DMSO, 400 MHz): δ = 10.74 (s, 1H), 7.82 (d, *J* = 7.6 Hz, 1H), 7.71 (d, *J* = 8.0 Hz, 1H), 7.31 (d, *J* = 8.0 Hz, 1H), 7.19-7.15 (m, 1H), 7.02 (t, *J* = 7.6 Hz, 1H), 6.63 (s, 1H), 6.49 (dd, *J*<sub>1</sub> = 2.0 Hz, *J*<sub>2</sub> = 8.0 Hz, 1H), 5.18 (brs, 2H); <sup>13</sup>C NMR (DMSO, 100 MHz): δ = 148.2, 142.4, 139.7, 124.0, 123.3, 121.0, 118.6, 118.5, 113.6, 110.5, 108.6, 94.8; IR (thin film): 3428, 2251, 1632, 1243, 824, 762, 626 cm<sup>-1</sup>; MS (70 eV): *m/z* (%) 182.1 (M<sup>+</sup>,100).

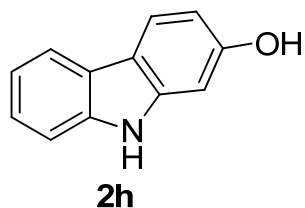

### 14) 9H-Carbazol-2-ol (**2h**)<sup>7</sup>

The reaction of 2'-iodo-[1,1'-biphenyl]-4-ol (**1h**) (0.5 mmol, 148 mg), A21-CuI (0.025 mmol, 20mg), NaN<sub>3</sub> (1.0 mmol, 65 mg), 4 Å MS (100 mg) were stirred in 2 mL dry DMF at 150 °C under argon for 48 h afforded 33.8 mg (37%) of **2h** as solid: <sup>1</sup>H NMR (DMSO, 400 MHz): δ = 10.95 (s, 1H), 9.42 (s, 1H), 7.92 (d, *J* = 7.6 Hz, 1H), 7.85 (d, *J* = 7.6 Hz, 1H), 7.36 (d, *J* = 8.0 Hz, 1H), 7.24 (t, *J* = 7.6 Hz, 1H), 7.07 (t, *J* = 7.6 Hz, 1H), 6.83-6.82 (m, 1H), 6.65-6.62 (m, 1H); <sup>13</sup>C NMR (DMSO, 100 MHz): δ = 156.9, 141.9, 140.0, 124.2, 123.4, 121.3, 119.3, 118.8, 115.6, 110.8, 108.7, 96.7; IR (thin film): 3429, 2251, 1659, 824, 762, 625 cm<sup>-1</sup>; MS (70 eV): *m/z* (%) 183.1 (M<sup>+</sup>,100).

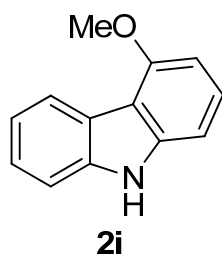

### 7) 4-Methoxy-9H-carbazole (**2i**)<sup>5</sup>

The reaction of 2-iodo-2'-methoxy-1,1'-biphenyl (**1i**) (0.5 mmol, 155 mg), A21-CuI (0.025 mmol, 20mg), NaN<sub>3</sub> (1.0 mmol, 65 mg), 4 Å MS (100 mg) were stirred in 2 mL dry DMF at 150 °C under argon for 48 h afforded 73 mg (74%) of **2i** as solid: <sup>1</sup>H NMR (CDCl<sub>3</sub>, 400 MHz): δ = 8.42 (d, *J* = 7.6 Hz, 1H), 7.92 (s, 1H), 7.45-7.33 (m, 4H), 7.01 (d, *J* = 8.0 Hz, 1H), 6.74 (d, *J* = 8.4 Hz, 1H), 4.12 (s, 3H); <sup>13</sup>C NMR (CDCl<sub>3</sub>, 100 MHz): δ = 156.2, 140.8, 138.6, 126.6, 124.9, 123.0, 122.6, 119.5, 112.5, 109.9, 103.5, 100.3, 55.3; IR (thin film): 3403, 3229, 3176, 2959, 1734, 1456 cm<sup>-1</sup>; MS (70 eV): *m/z* (%) 310.0 (M<sup>+</sup>,100).

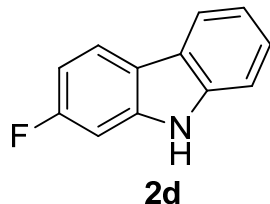

### 8) 2-Fluoro-9H-carbazole (**2d**)<sup>3</sup>

The reaction of 4-fluoro-2-iodo-1,1'-biphenyl (**1j**) (0.5 mmol, 149 mg), A21-CuI (0.025 mmol, 20mg), NaN<sub>3</sub> (1.0 mmol, 65 mg), 4 Å MS (100 mg) were stirred in 2 mL dry DMF at 150 °C under argon for 48 h afforded 51.6 mg (56%) of **2d** as solid.

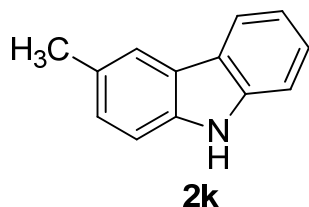

### 9) 3-Methyl-9H-carbazole (**2k**)<sup>3</sup>

The reaction of 2-iodo-5-methyl-1,1'-biphenyl (**1k**) (0.5 mmol, 147 mg), A21-CuI (0.025 mmol, 20mg), NaN<sub>3</sub> (1.0 mmol, 65 mg), 4 Å MS (100 mg) were stirred in 2 mL



dry DMF at 150 °C under argon for 48 h afforded 70.8 mg (78%) of **2k** as solid: <sup>1</sup>H NMR (DMSO, 400 MHz): δ = 11.14 (s, 1H), 8.06 (d, *J* = 7.6 Hz, 1H), 7.90 (s, 1H), 7.49 (d, *J* = 8.0 Hz, 1H), 7.42-7.35 (m, 2H), 7.22 (d, *J* = 8.0 Hz, 1H), 7.16-7.12 (m, 1H), 2.48 (s, 3H); <sup>13</sup>C NMR (DMSO, 100 MHz): δ = 140.5, 138.5, 127.6, 127.3, 125.8, 123.1, 122.7, 120.5, 120.4, 118.7, 111.3, 111.1, 21.6; IR (thin film): 3464, 2250, 1660, 1242, 823, 761 cm<sup>-1</sup>; MS (70 eV): *m/z* (%) 181.1 (M<sup>+</sup>,100).

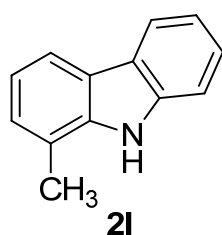

#### 10) 4-Methyl-9H-carbazole (**2l**)<sup>3</sup>

The reaction of 2-iodo-5-methyl-1,1'-biphenyl (**1l**) (0.5 mmol, 147 mg), A21-CuI (0.025 mmol, 20mg), NaN<sub>3</sub> (1.0 mmol, 65 mg), 4 Å MS (100 mg) were stirred in 2 mL dry DMF at 150 °C under argon for 48 h afforded 51 mg (56%) of **2l** as solid: <sup>1</sup>H NMR (DMSO, 400 MHz): δ = 11.20 (s, 1H), 8.09 (d, *J* = 7.6 Hz, 1H), 7.94 (d, *J* = 7.6 Hz, 1H), 7.55 (d, *J* = 8.0 Hz, 1H), 7.42-7.38 (m, 1H), 7.21-7.14 (m, 2H), 7.08 (t, *J* = 7.6 Hz, 1H), 2.58(s, 3H); <sup>13</sup>C NMR (DMSO, 100 MHz): δ = 140.3, 139.5, 126.4, 125.8, 123.3, 122.5, 120.7, 120.5, 119.1, 119.0, 118.1, 111.5, 17.5; IR (thin film): 3432, 2251, 1659, 1239, 823, 761 cm<sup>-1</sup>; MS (70 eV): *m/z* (%) 181.1 (M<sup>+</sup>,100).

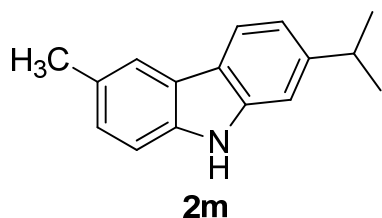

#### 11) 2-Isopropyl-6-methyl-9H-carbazole (**2m**)<sup>3</sup>

The reaction of 2-iodo-4'-isopropyl-5-methyl-1,1'-biphenyl (**1m**) (0.5 mmol, 168 mg), A21-CuI (0.025 mmol, 20mg), NaN<sub>3</sub> (1.0 mmol, 65 mg), 4 Å MS (100 mg) were stirred in 2 mL dry DMF at 150 °C under argon for 48 h afforded 78 mg (70%) of **2m** as solid: <sup>1</sup>H NMR (DMSO, 400 MHz): δ = 10.98 (s, 1H), 7.93 (d, *J* = 8.0 Hz, 1H),

7.84 (s, 1H), 7.38 (d,  $J = 8.0$  Hz, 1H), 7.31 (s, 1H), 7.18 (dd,  $J_1 = 1.6$  Hz,  $J_2 = 8.0$  Hz 1H), 7.19 (dd,  $J_1 = 1.2$  Hz,  $J_2 = 8.0$  Hz 1H), 3.05-3.02(m, 1H), 2.47(s, 3H), 1.30(d,  $J = 7.6$  Hz, 6H);  $^{13}\text{C}$  NMR (DMSO, 100 MHz):  $\delta = 146.6, 140.9, 138.6, 127.4, 126.7, 123.2, 120.9, 120.3, 120.1, 117.8, 111.0, 108.5, 34.4, 24.8, 21.6$ ; IR (thin film): 3431, 2251, 1659, 1246, 823, 761  $\text{cm}^{-1}$ ; MS (70 eV):  $m/z$  (%) 223.1 ( $\text{M}^+$ , 100).

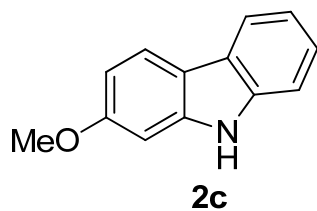

### 12) 2-Methoxy-9H-carbazole (**2c**)<sup>3</sup>

The reaction of 2-iodo-4-methoxy-1,1'-biphenyl (**1n**) (0.5 mmol, 155 mg), A21-CuI (0.025 mmol, 20mg),  $\text{NaN}_3$  (1.0 mmol, 65 mg), 4 Å MS (100 mg) were stirred in 2 mL dry DMF at 150 °C under argon for 48 h afforded 68 mg (69%) of **2c**.

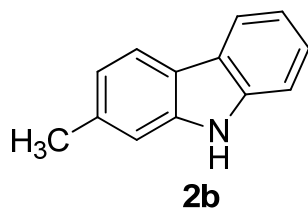

### 15) 2-Methyl-9H-carbazole (**2b**)<sup>3</sup>

The reaction of 2-iodo-4-methyl-1,1'-biphenyl (**1o**) (0.5 mmol, 147 mg), A21-CuI (0.025 mmol, 20mg),  $\text{NaN}_3$  (1.0 mmol, 65 mg), 4 Å MS (100 mg) were stirred in 2 mL dry DMF at 150 °C under argon for 48 h afforded 73.3 mg (81%) of **2b**.

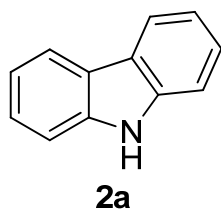

### 16) 9H-Carbazole (**2a**)<sup>3</sup>

The reaction of 2-bromo-1,1'-biphenyl (**1p**) (0.5 mmol, 116.5 mg), A21-CuI (0.025 mmol, 20mg),  $\text{NaN}_3$  (1.0 mmol, 65 mg), 4 Å MS (100 mg) were stirred in 2 mL dry

DMF at 150 °C under argon for 72 h afforded 50.9 mg (61%) of **2p** as white solid.

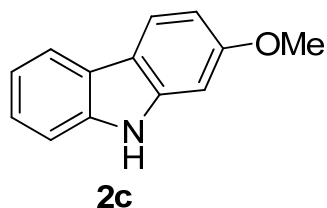

### 17) 2-Methoxy-9H-carbazole (**2c**)<sup>3</sup>

The reaction of 2-bromo-4'-methoxy-1,1'-biphenyl (**1q**) (0.5 mmol, 131 mg), A21-CuI (0.025 mmol, 20mg), NaN<sub>3</sub> (1.0 mmol, 65 mg), 4 Å MS (100 mg) were stirred in 2 mL dry DMF at 150 °C under argon for 72 h afforded 75.8 mg (77%) of **2c**.

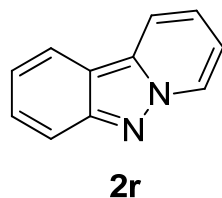

### 18) Pyrido[1,2-b]indazole (**2r**)<sup>8</sup>

The reaction of 2-(2-iodophenyl)pyridine (**1r**) (0.5 mmol, 140.5 mg), A21-CuI (0.025 mmol, 20mg), NaN<sub>3</sub> (1.0 mmol, 65 mg), 4 Å MS (100 mg) were stirred in 2 mL dry DMF at 150 °C under argon for 72 h afforded 53.8 mg (64%) of **2r** as solid: <sup>1</sup>H NMR (DMSO, 400 MHz): δ = 9.03 (d, *J* = 6.8 Hz, 1H), 8.42 (d, *J* = 8.0 Hz, 1H), 8.27 (d, *J* = 7.6 Hz, 1H), 7.77 (d, *J* = 7.6 Hz, 1H), 7.55-7.46 (m, 2H), 7.37-7.34 (m, 1H), 7.20(t, *J* = 7.6 Hz, 1H); <sup>13</sup>C NMR (DMSO, 100 MHz): δ = 149.5, 135.2, 128.7, 128.6, 123.0, 121.0, 119.7, 118.8, 117.5, 115.5, 115.2; IR (thin film): 3430, 2251, 1645, 824, 761, 625 cm<sup>-1</sup>; MS (70 eV): *m/z* (%) 168.1 (M<sup>+</sup>,100).

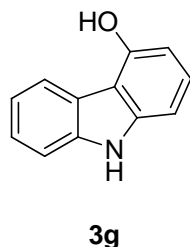

### 19) 9H-Carbazol-4-ol (**3g**)<sup>9</sup>

The reaction of 4-methoxy-9H-carbazole **2g**) (0.3 mmol, 59 mg), BBr<sub>3</sub> (0.25 mL), were stirred in 2 mL CH<sub>2</sub>Cl<sub>2</sub> at -30 °C for 3 h afforded 49 mg (90%) of **3g** as solid: <sup>1</sup>H

NMR (DMSO, 400 MHz):  $\delta$  = 11.13 (s, 1H), 10.03 (s, 1H), 8.17 (d,  $J$  = 8.0 Hz, 1H), 7.43 (d,  $J$  = 8.0 Hz, 1H), 7.32 (d,  $J$  = 8.0 Hz, 1H), 7.20-7.11 (m, 2H), 6.93 (d,  $J$  = 8.0 Hz, 1H), 6.59 (d,  $J$  = 8.0 Hz, 1H);  $^{13}\text{C}$  NMR (DMSO, 100 MHz):  $\delta$  = 153.9, 142.0, 139.4, 139.3, 126.9, 124.7, 122.6, 118.8, 111.5, 110.6, 104.5, 102.4; IR (thin film): 3428, 2251, 1661, 824, 762, 624  $\text{cm}^{-1}$ ; MS (70 eV):  $m/z$  (%) 183.1 ( $\text{M}^+$ , 100).

## Reference

1. Poriel, C.; Ferrand, Y.; Juillard, S.; Maux, P. L.; Simonneaux, G. *Tetrahedron* **2004**, *60*, 145.
2. Girard, C.; Önen, E.; Aufort, M.; Beauvière, S.; Samson, E.; Herscovici, J. *Org. Lett.* **2006**, *8*, 1689.
3. B. Stokes, J.; Jovanović, B.; Dong, H.; Richert, K. J.; Riell, R. D.; Driver, T. G. *J. Org. Chem.* **2009**, *74*, 3225.
4. Dodsworth, D. J.; Quesada P., A.; Rosa, M. D. *J. Heterocycl. Chem.* **1988**, *25*, 167.
5. Tsang, W. C. P.; Munday, R. H.; Brasche, G.; Zheng, N.; Buchwald, S. L. *J. Org. Chem.* **2008**, *73*, 7603.
6. Lancelot, J. C.; Jean, C.; Gazengel, J. M.; Rault, S.; Robba, M. *Chem. Pharm. Bull.* **1983**, *31*, 45.
7. Bonesi, S. M.; Ponce, M. A.; Erra-Balsells, R.; *J. Heterocycl. Chem.* **2004**, *41*, 161.
8. Zhao, J.; Wu, C.; Li, P.; Ai, W.; Chen, H.; Wang, C.; Larock, R. C.; Shi, F.; *J. Org. Chem.* **2011**, *76*, 6837.
9. Sissouma, D.; Maingot, L.; Collet, S.; Guingant, A. *J. Org. Chem.* **2006**, *71*, 8384.

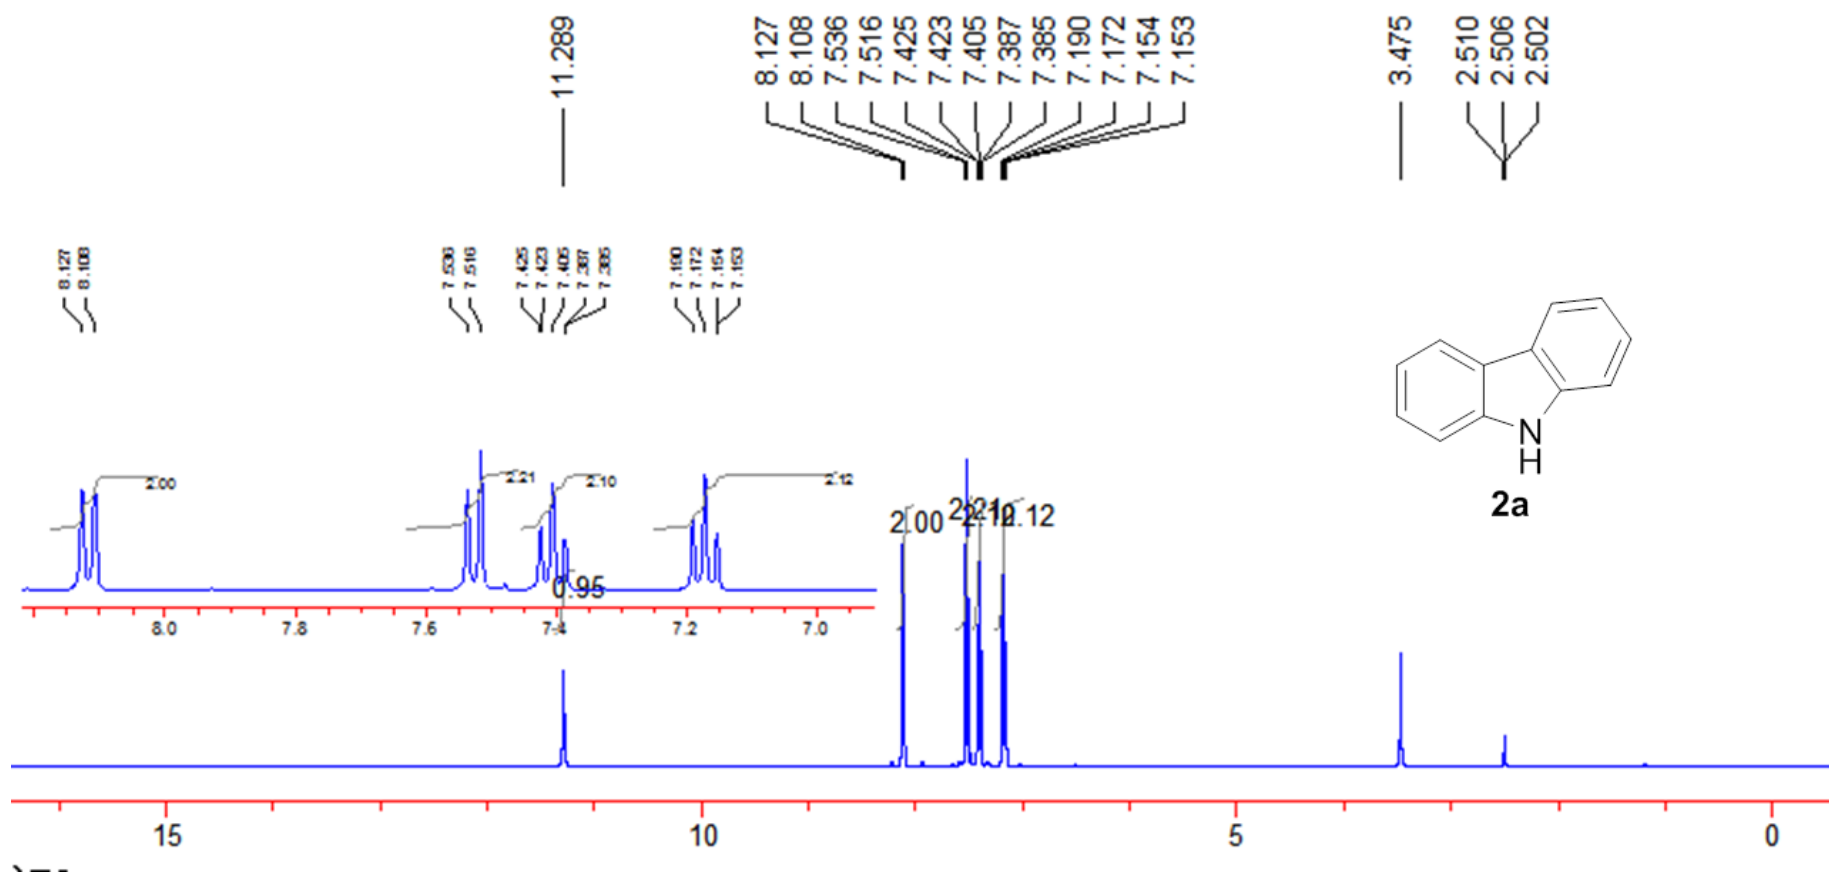

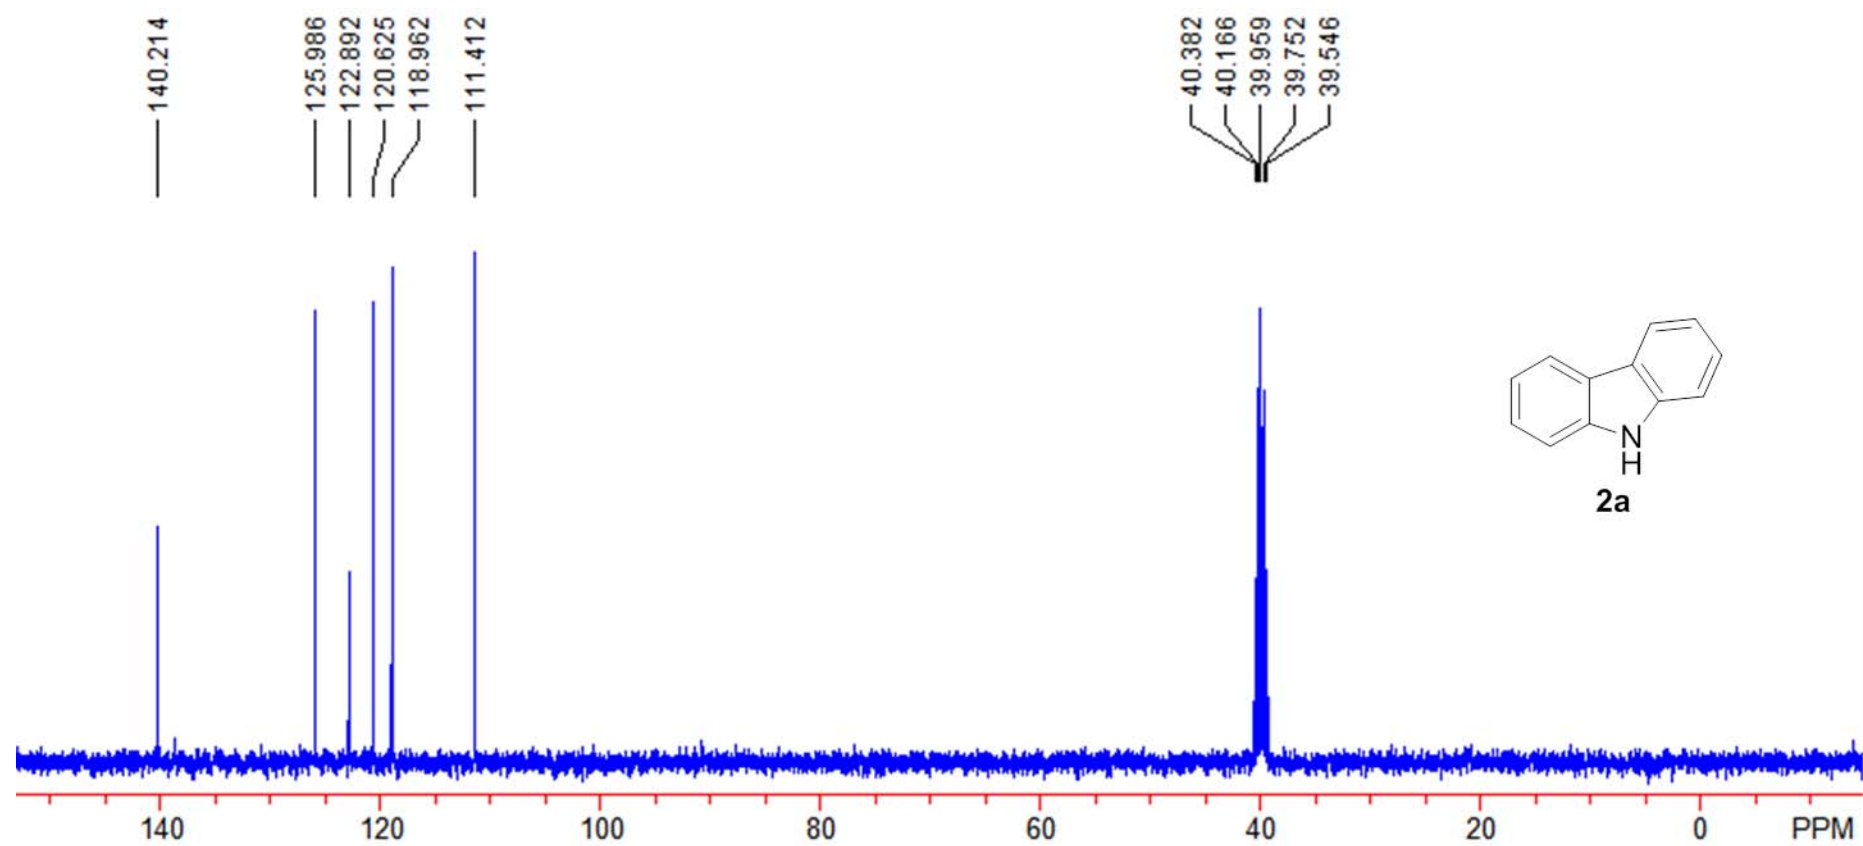

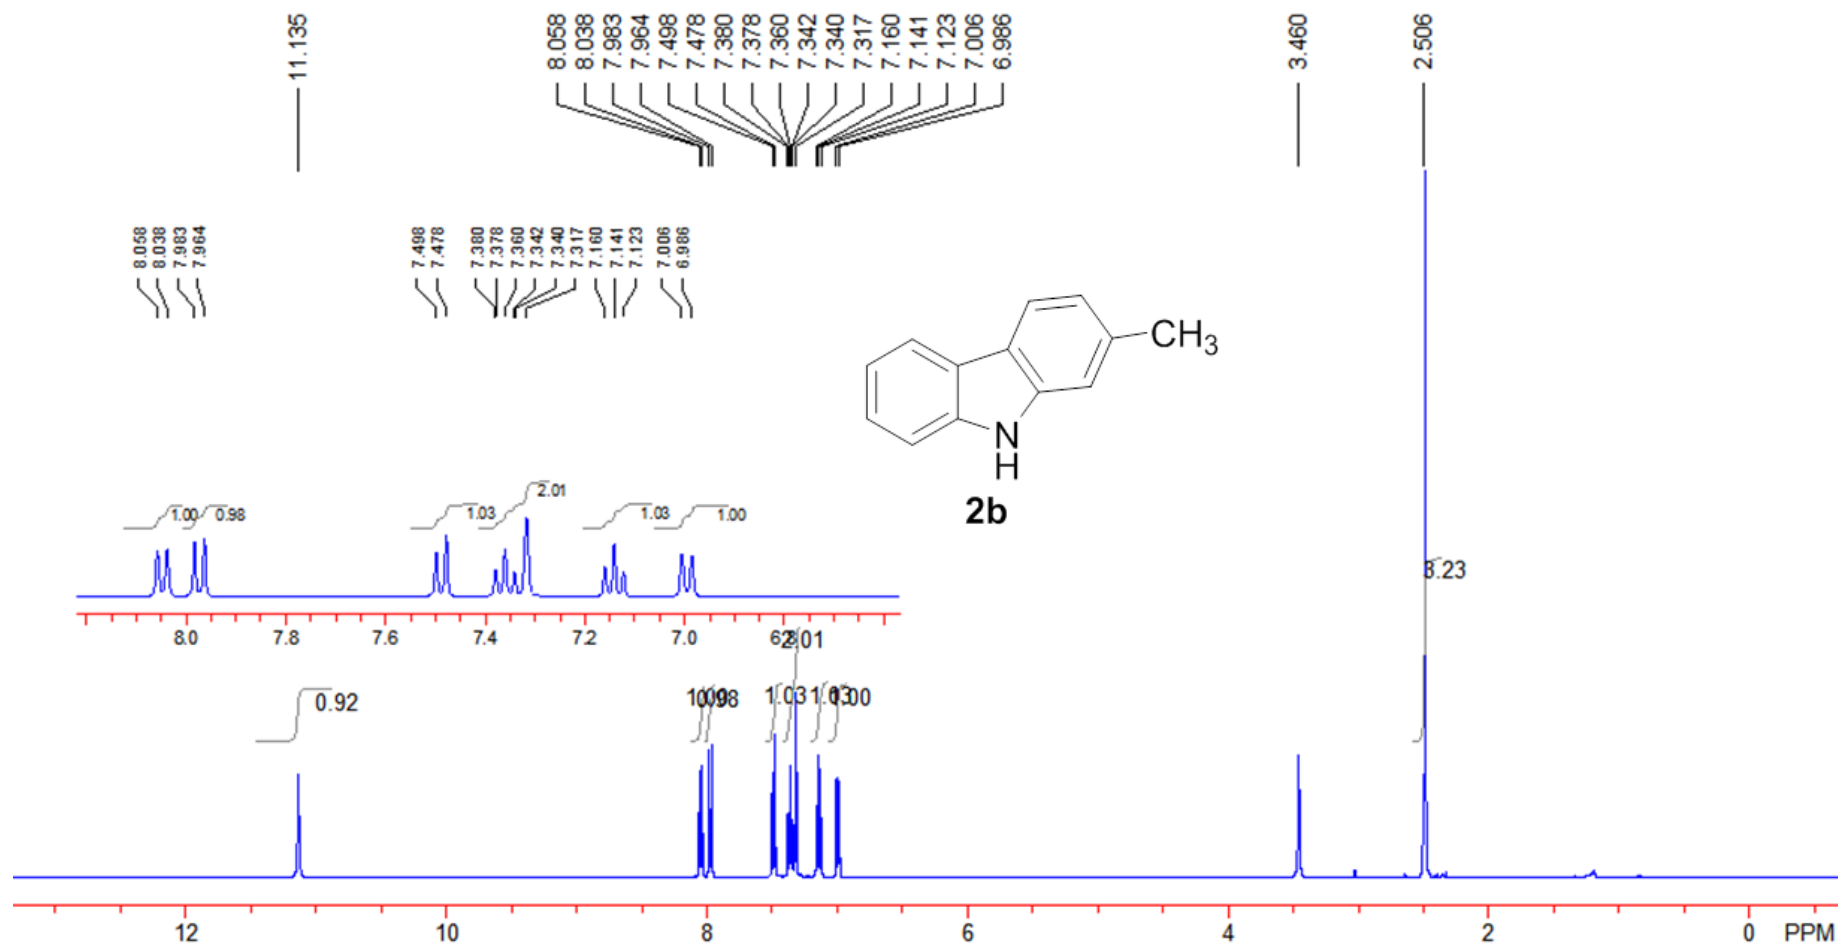

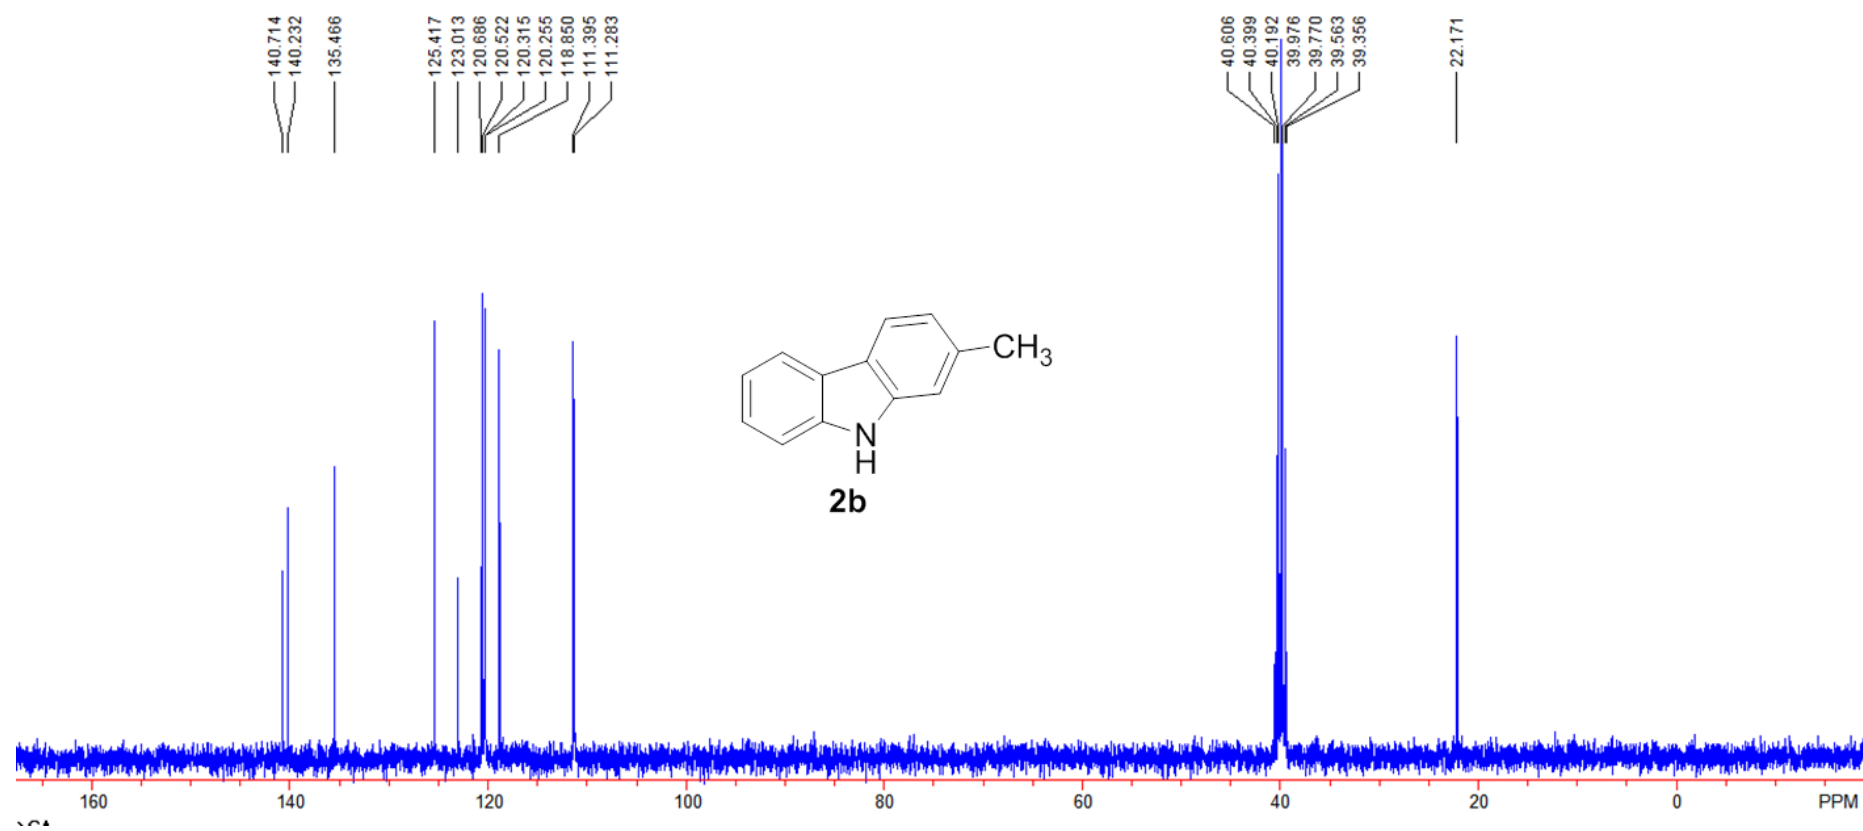



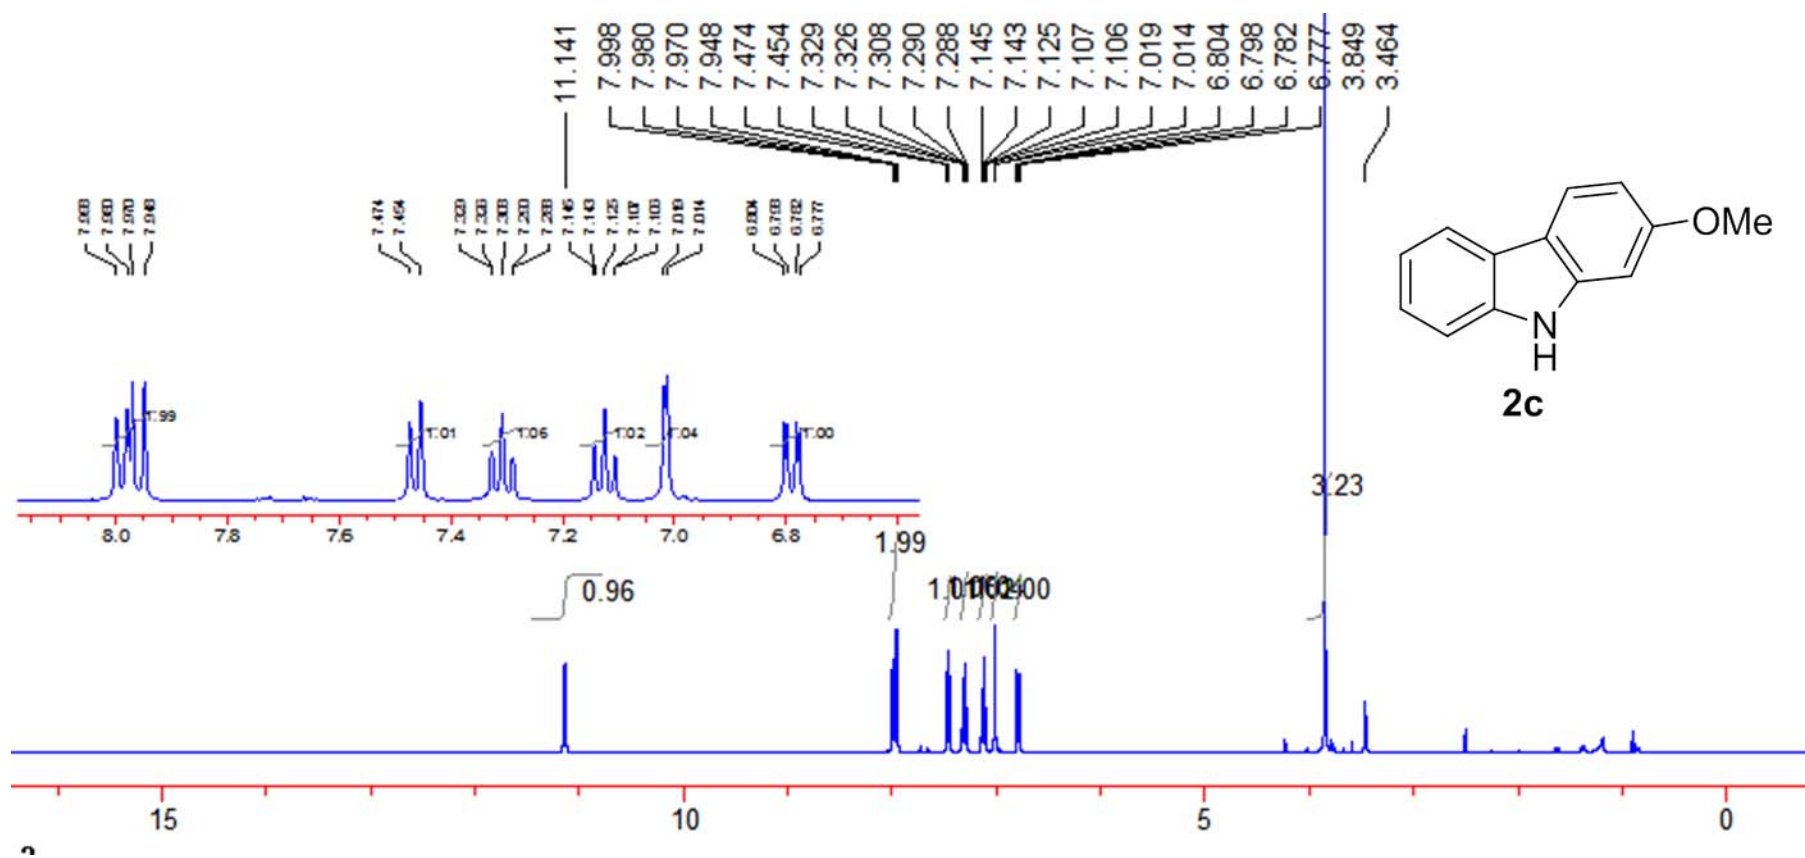

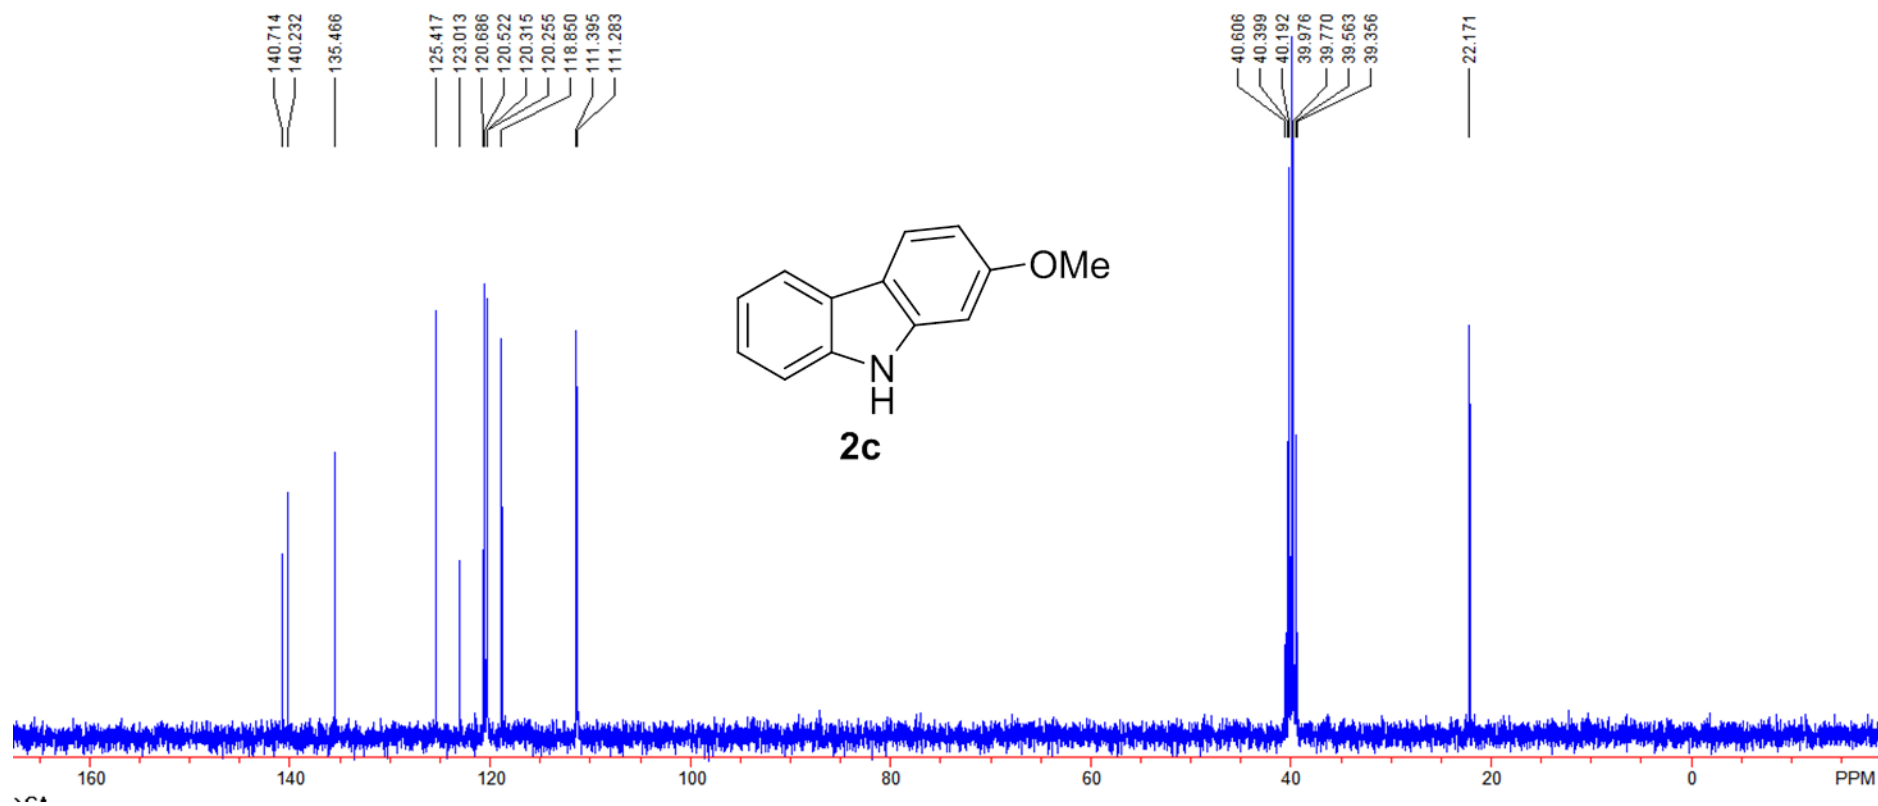

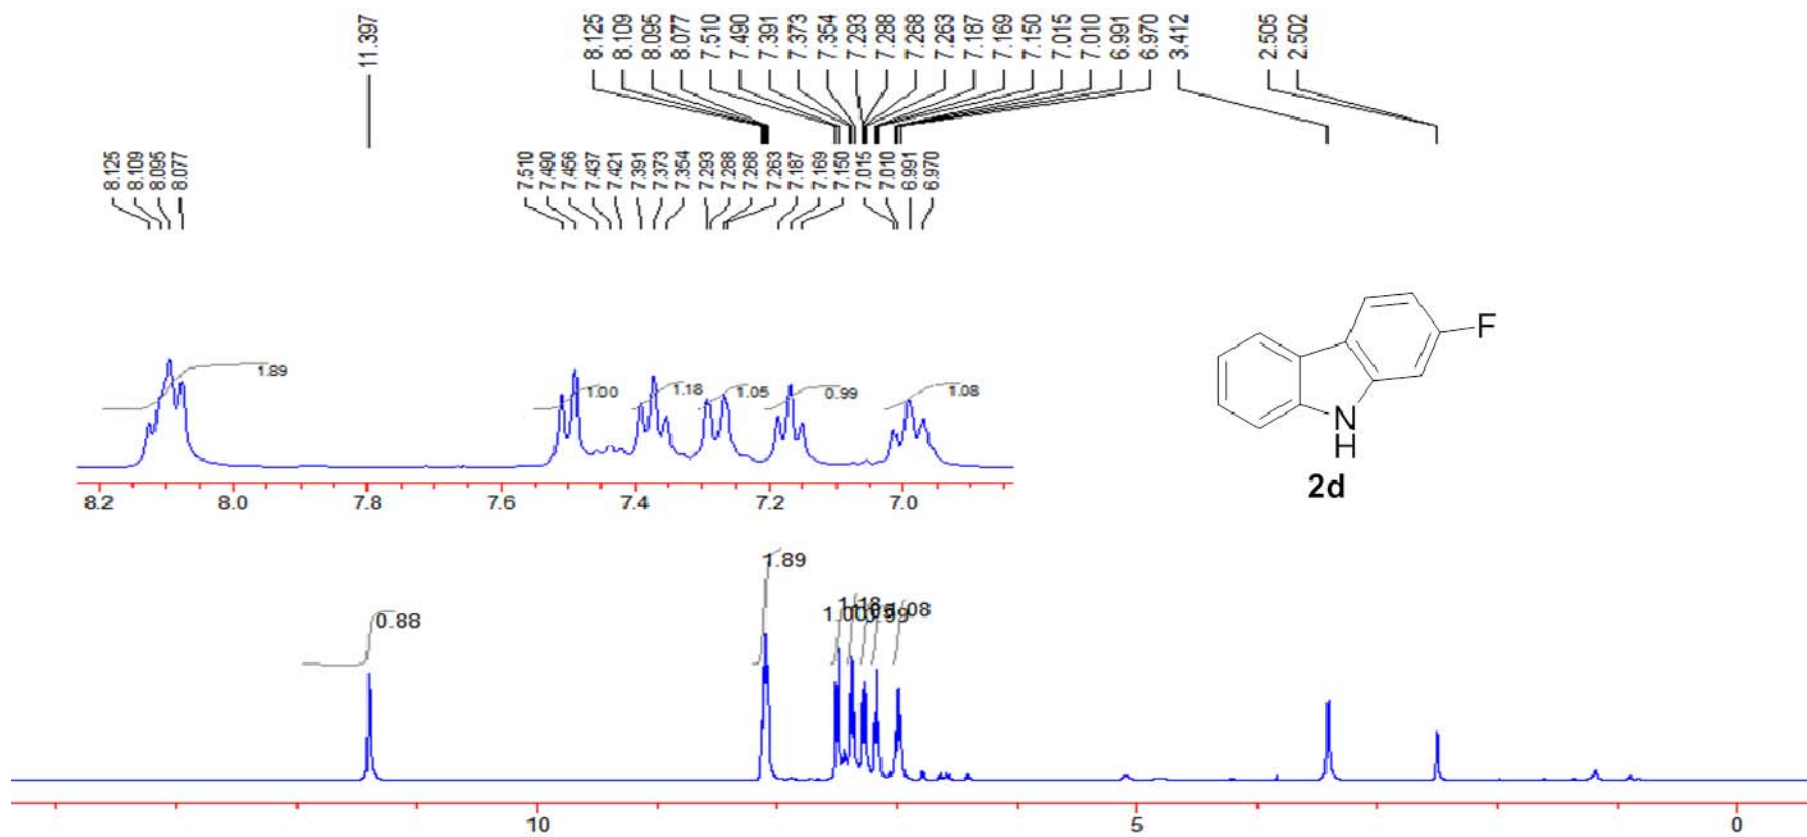

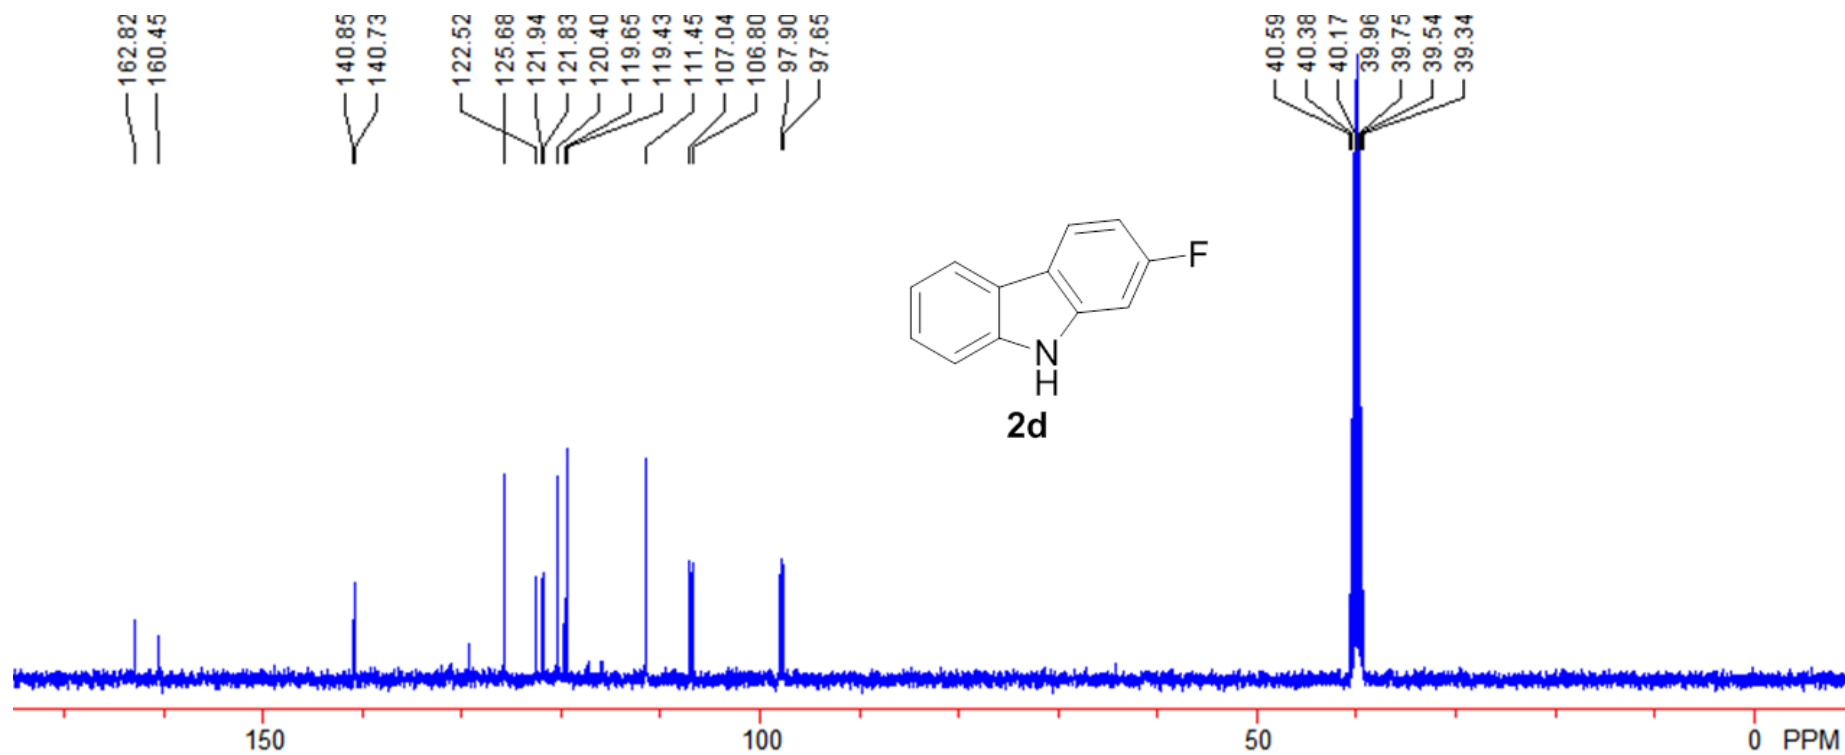

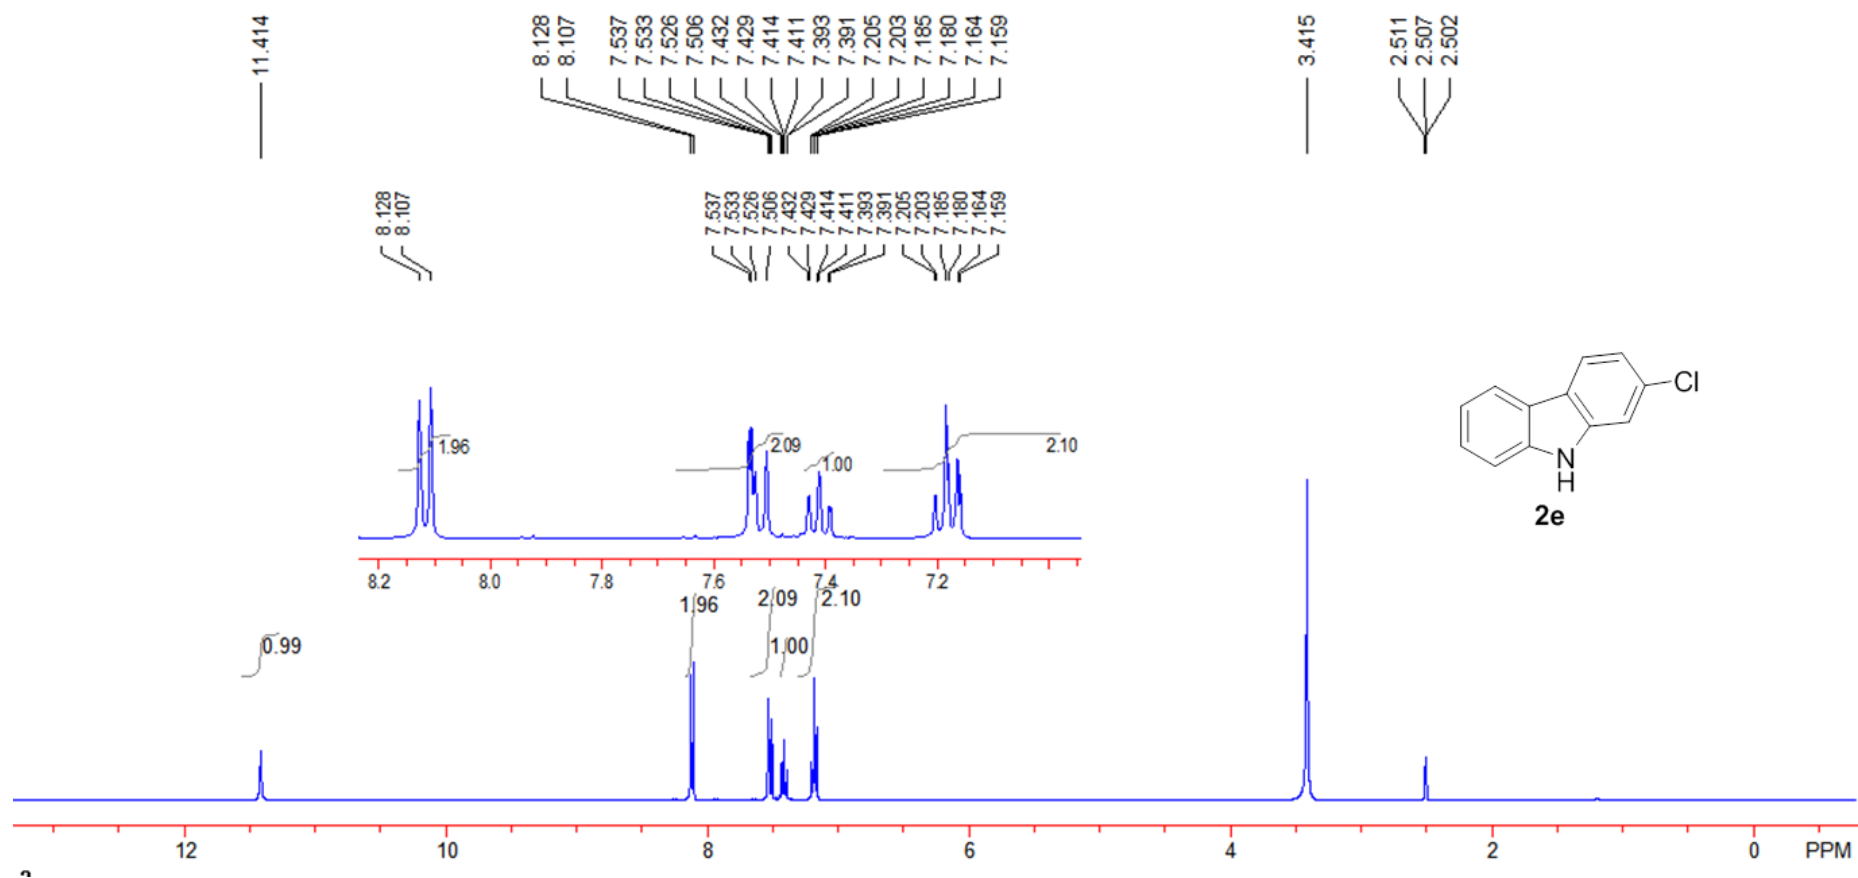

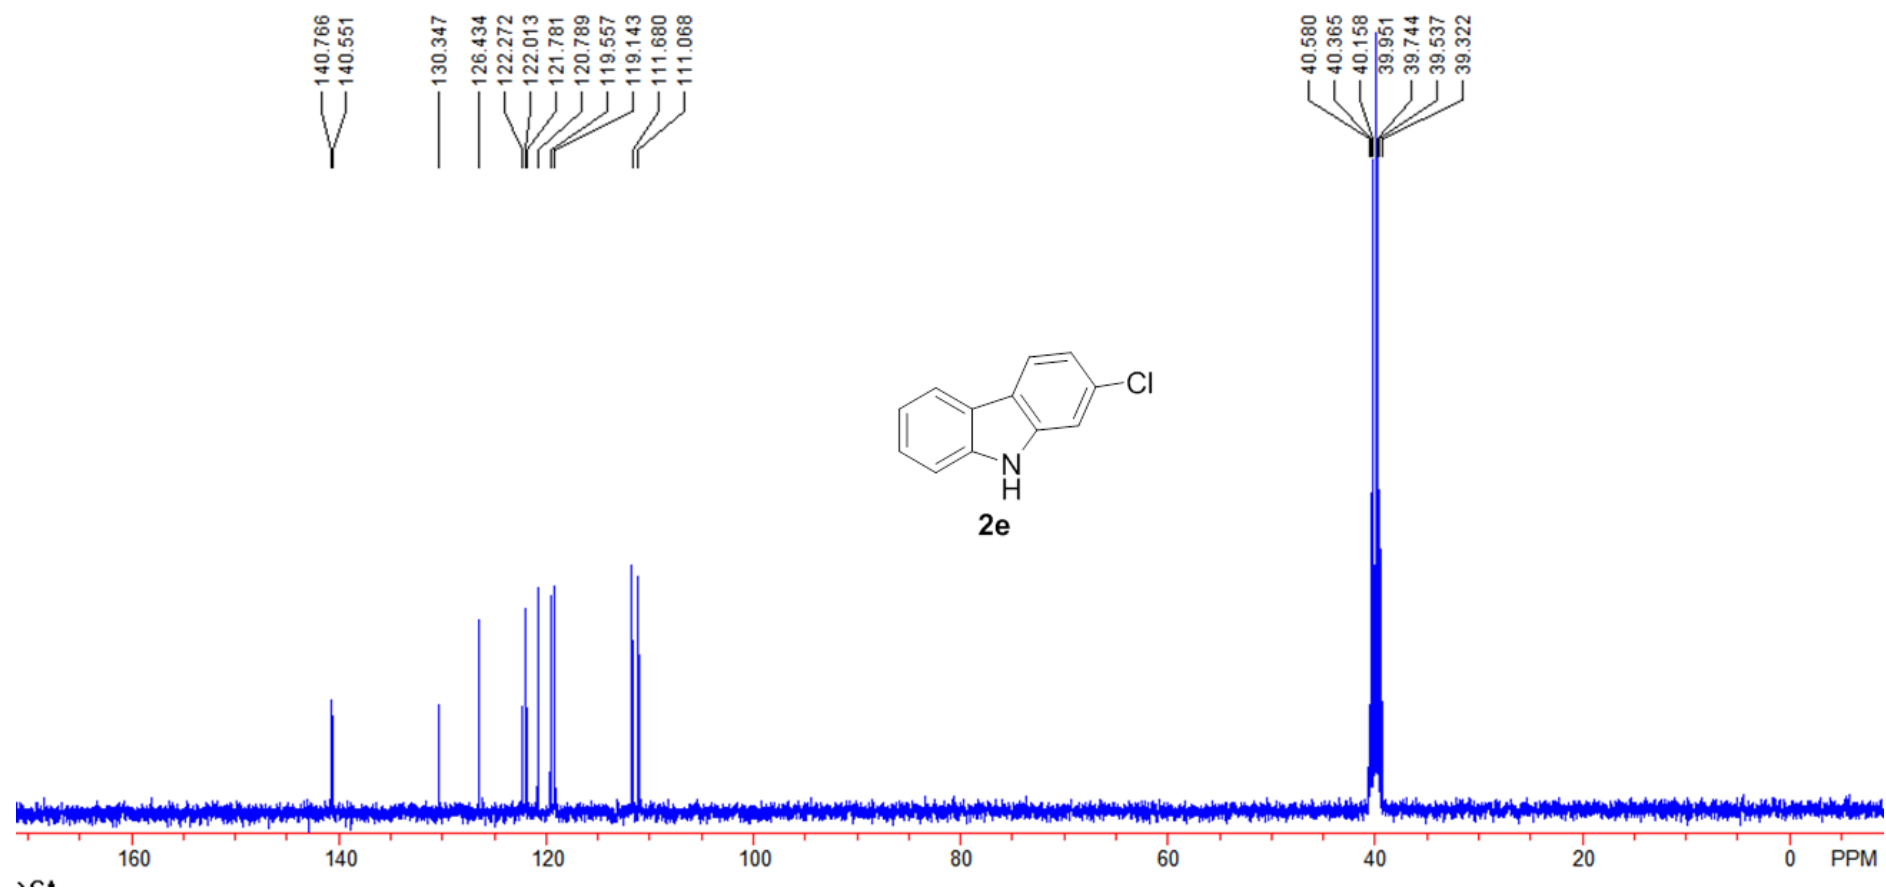

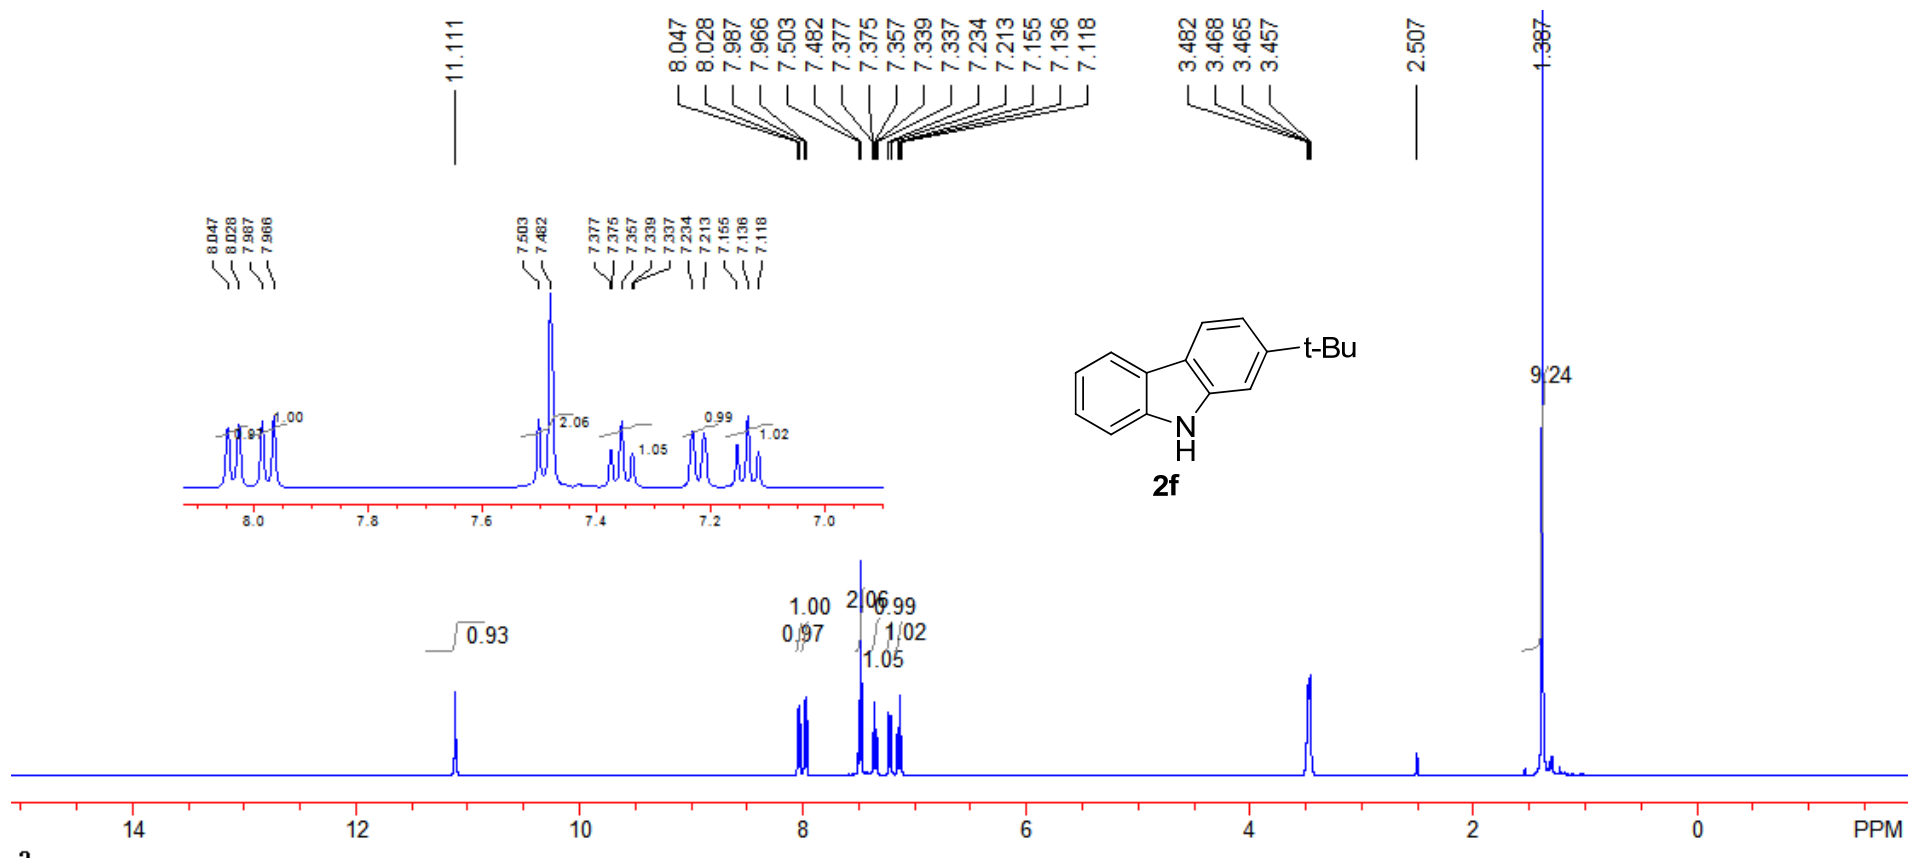

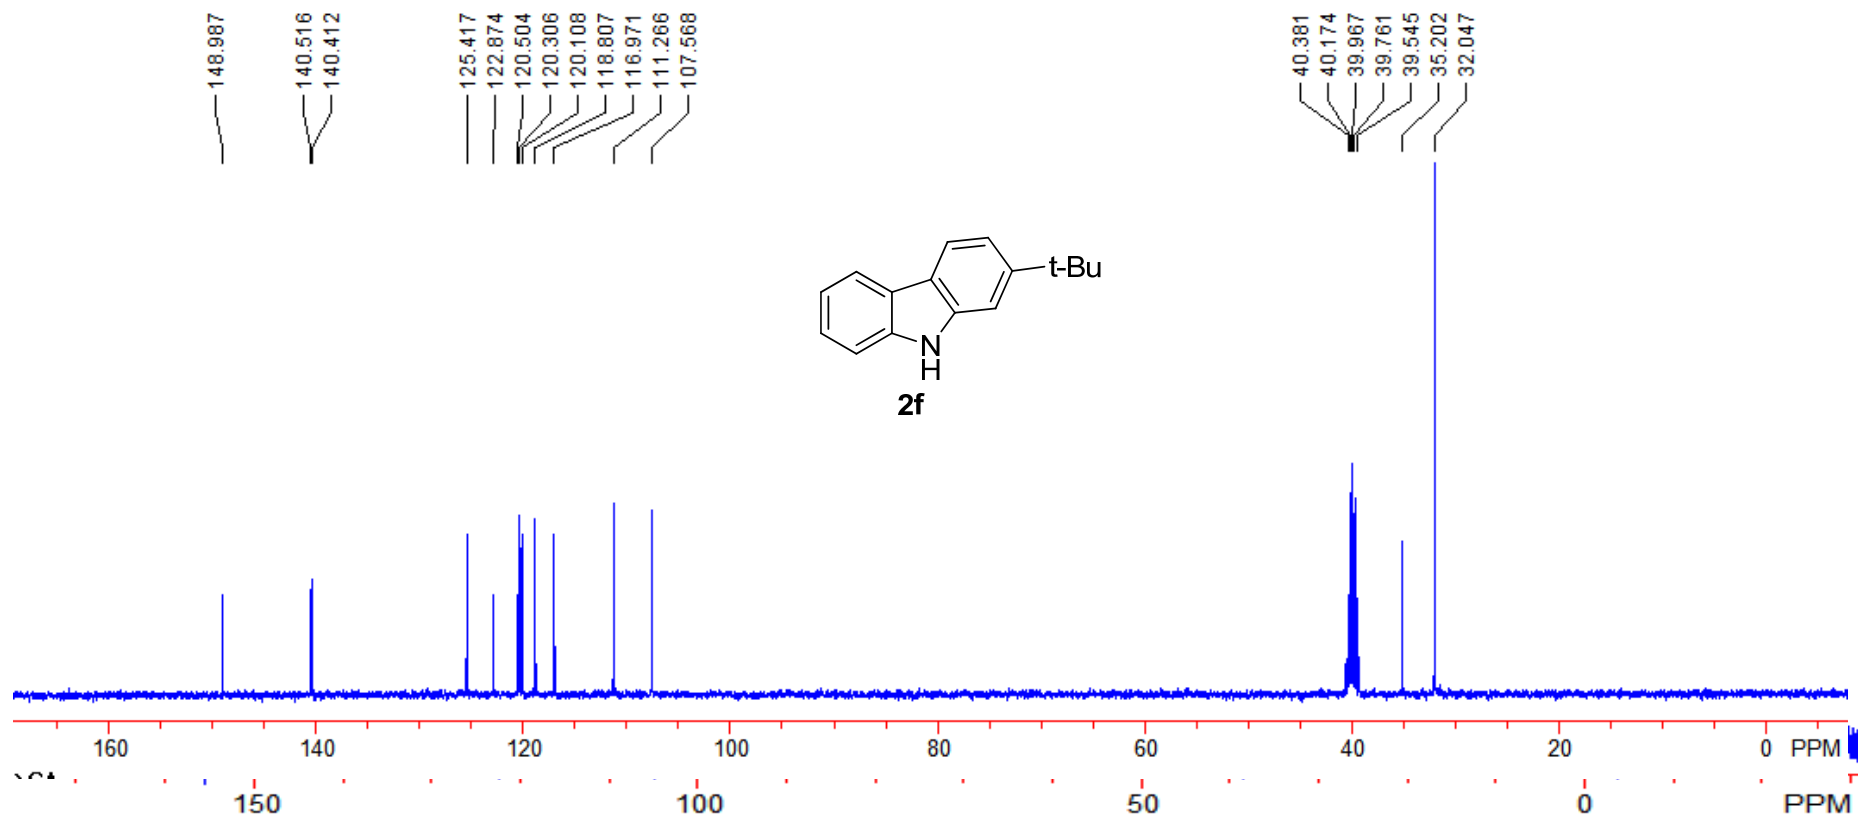



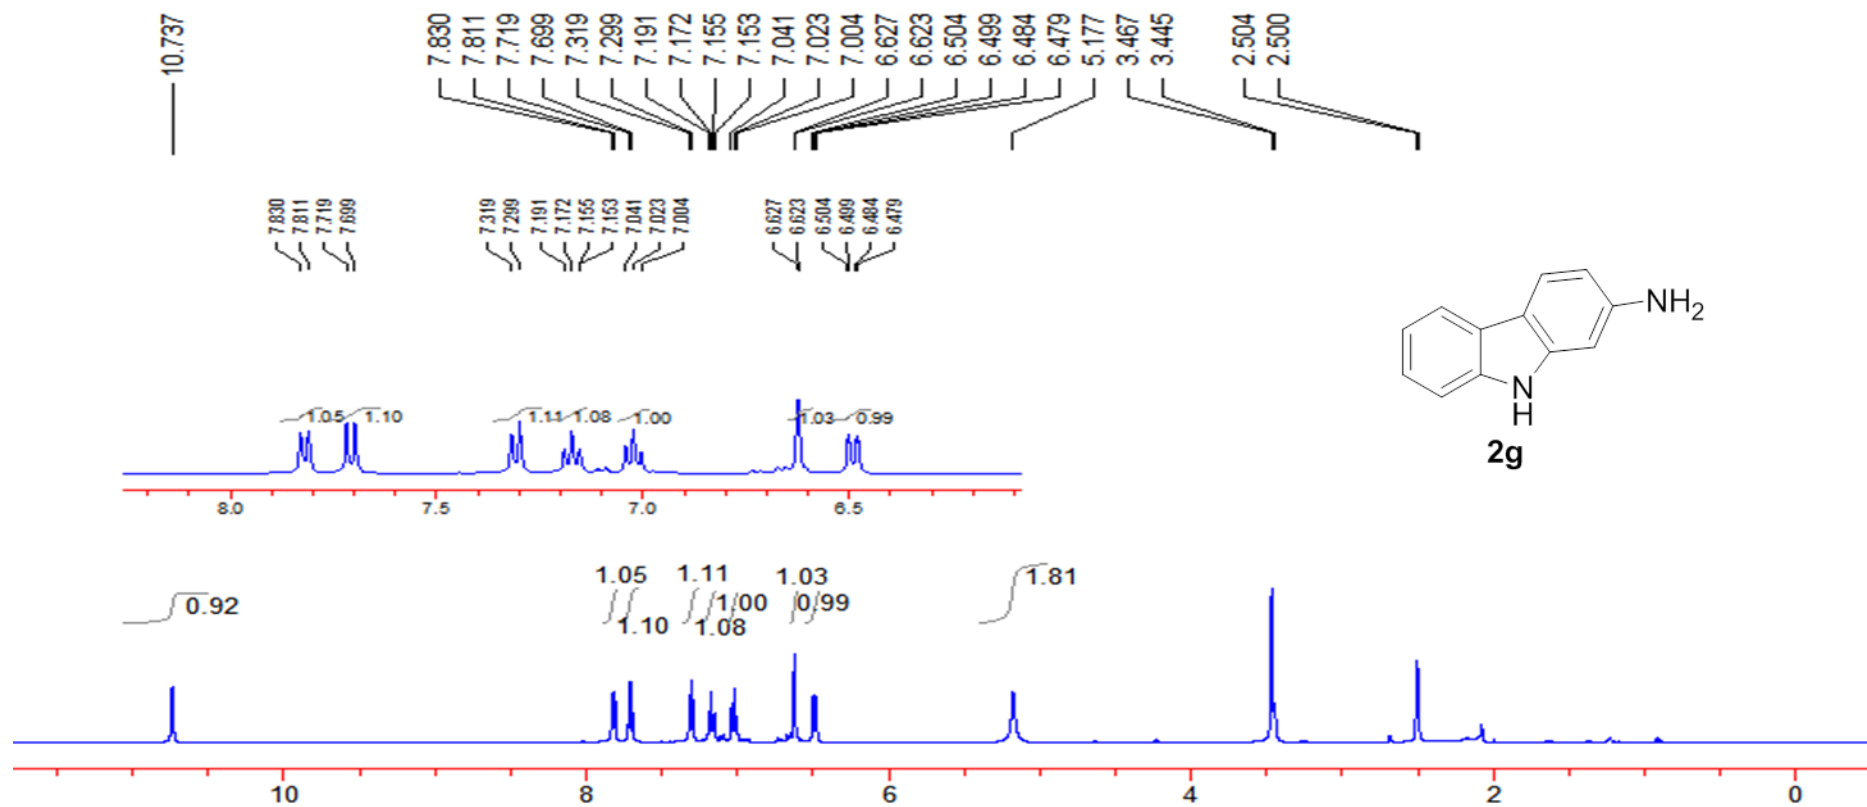

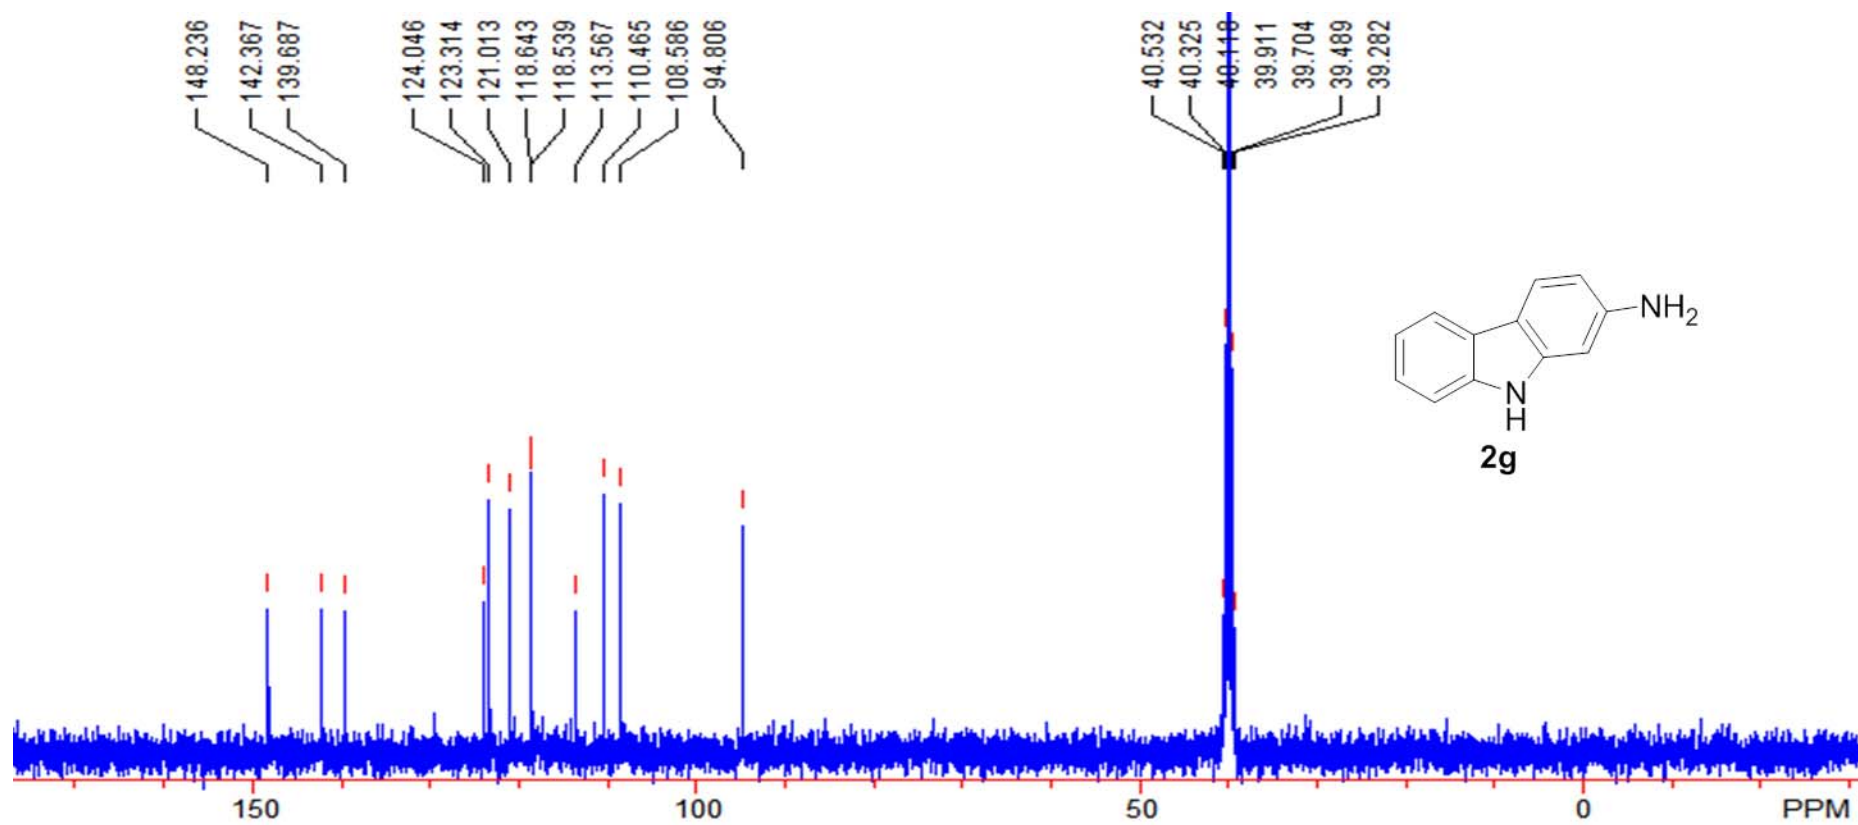

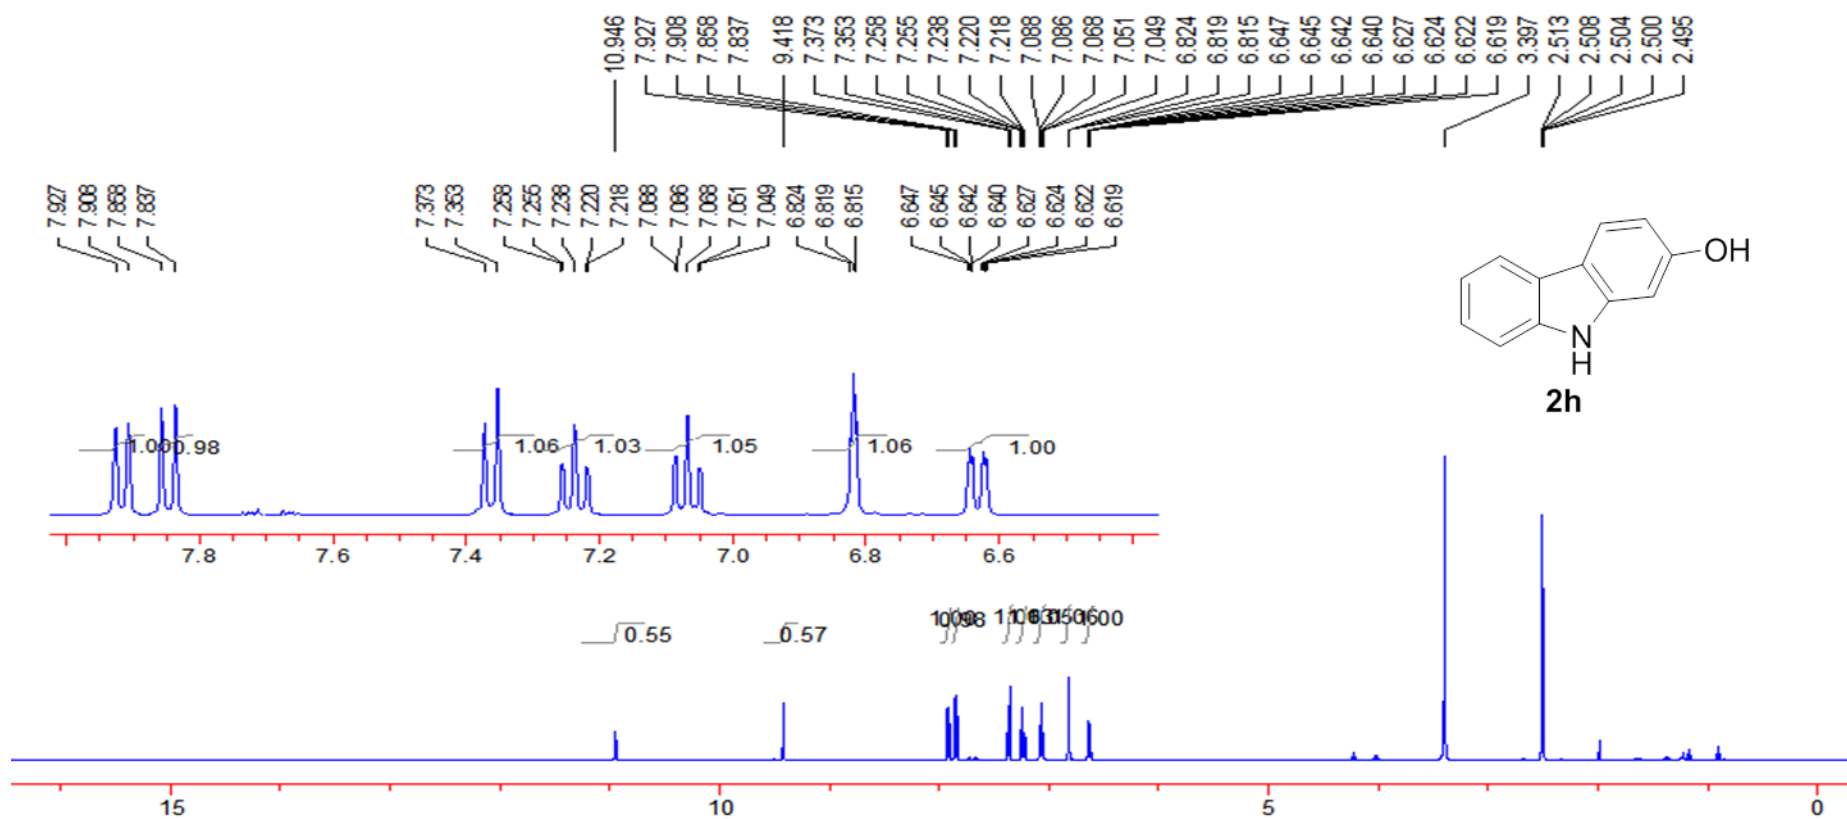

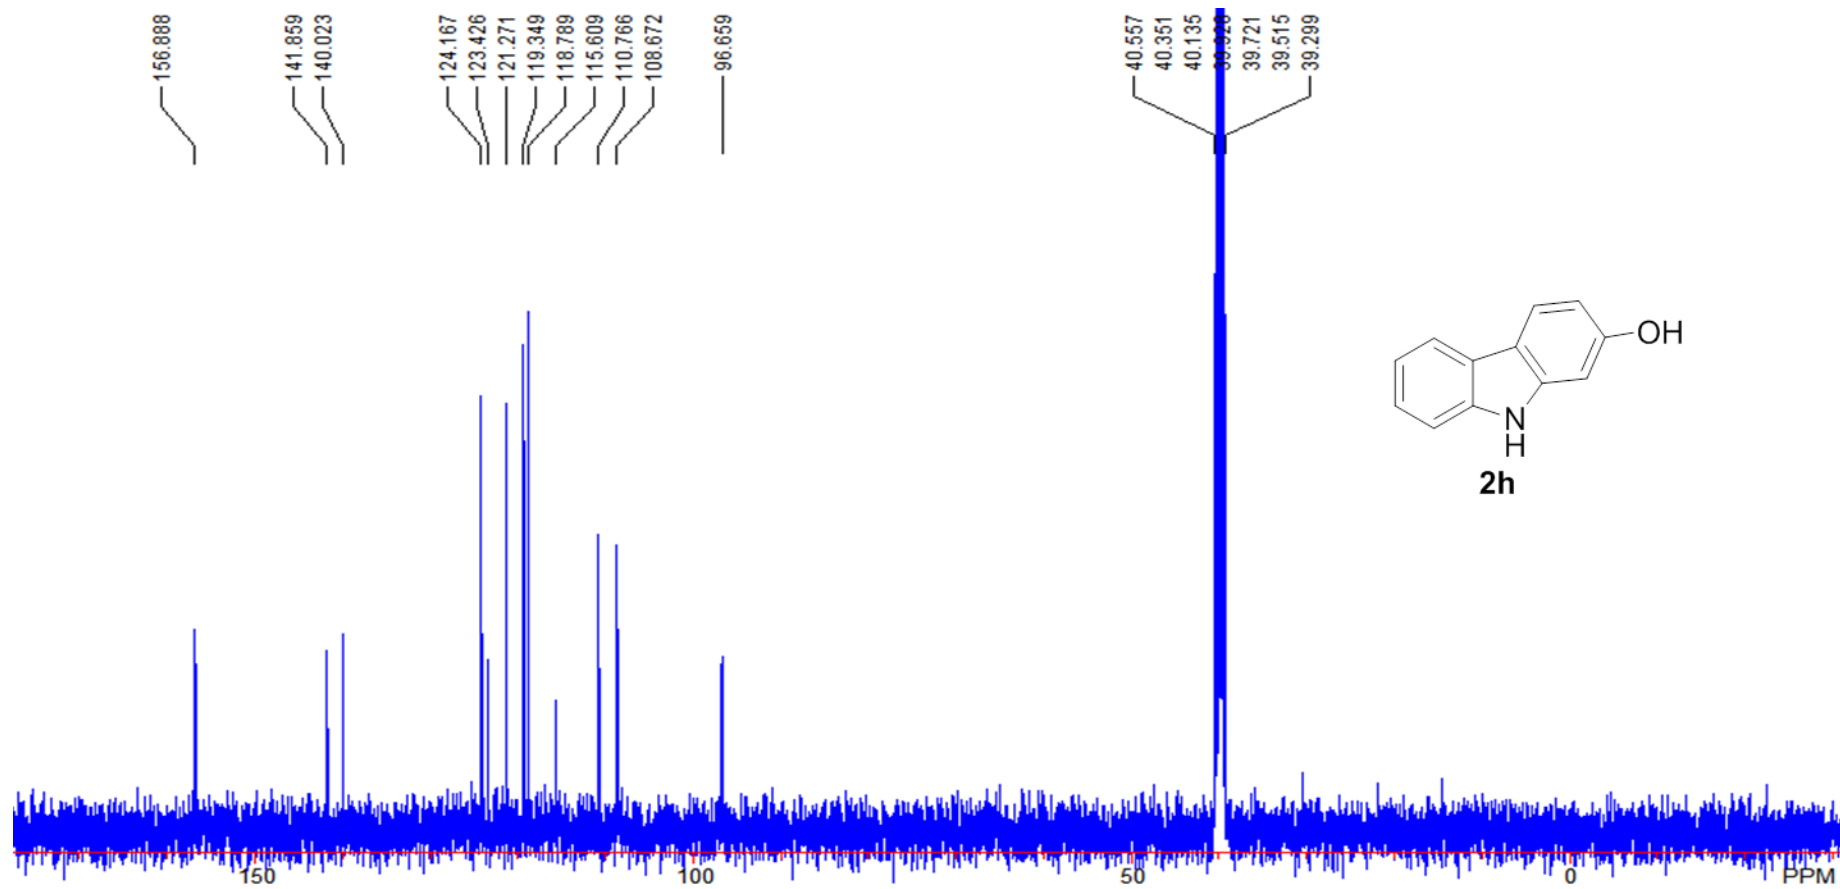

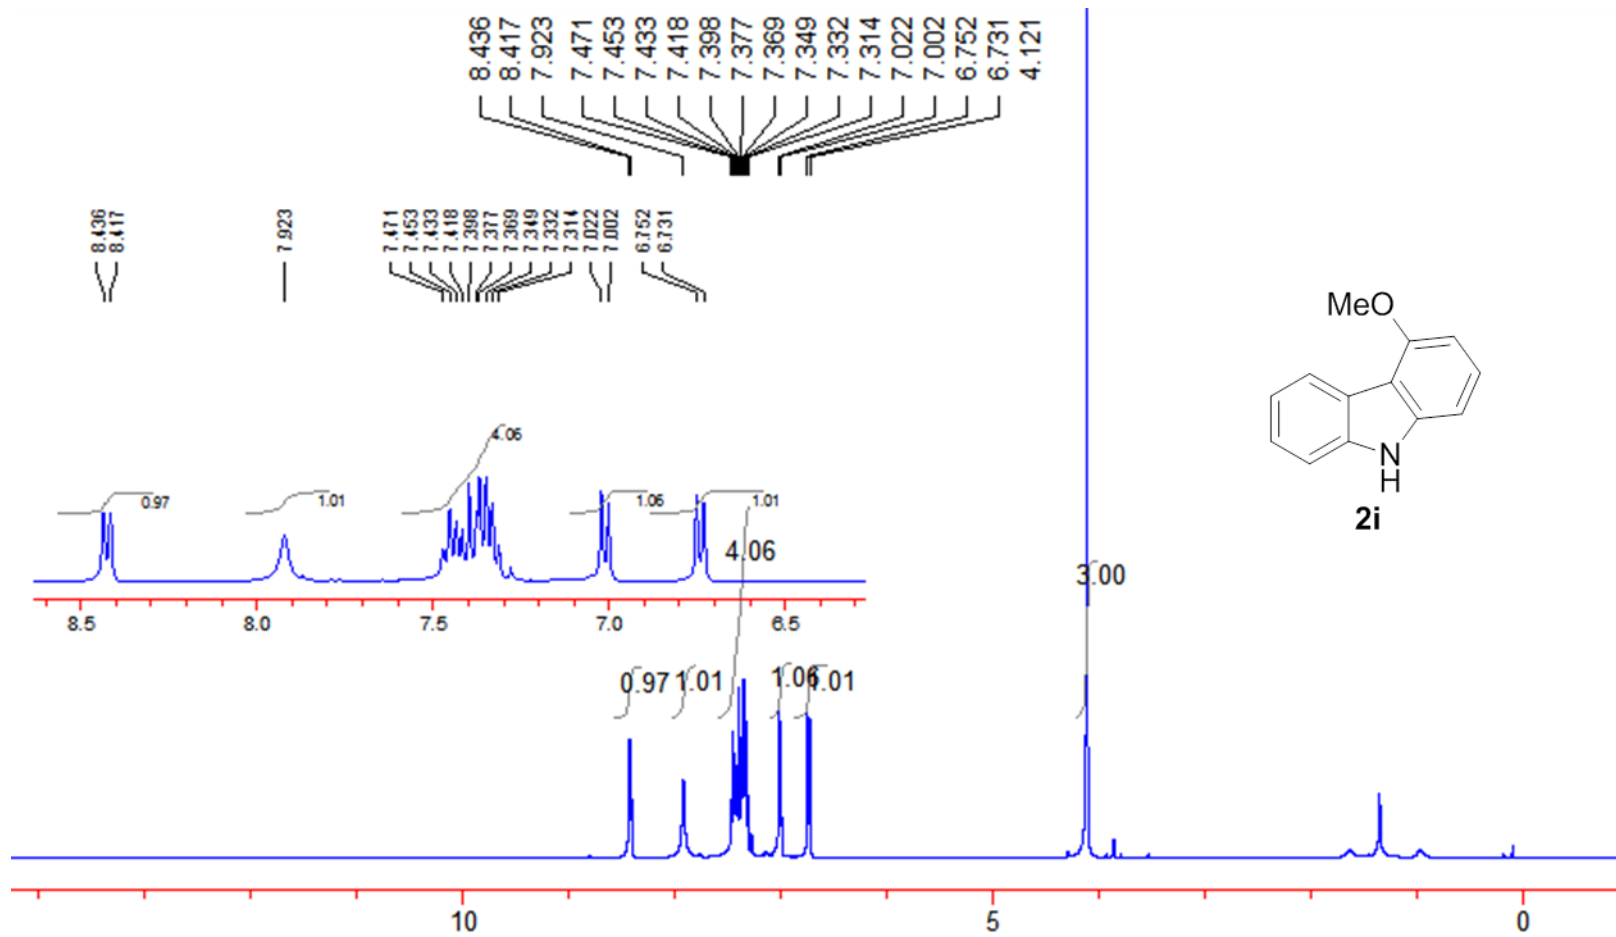

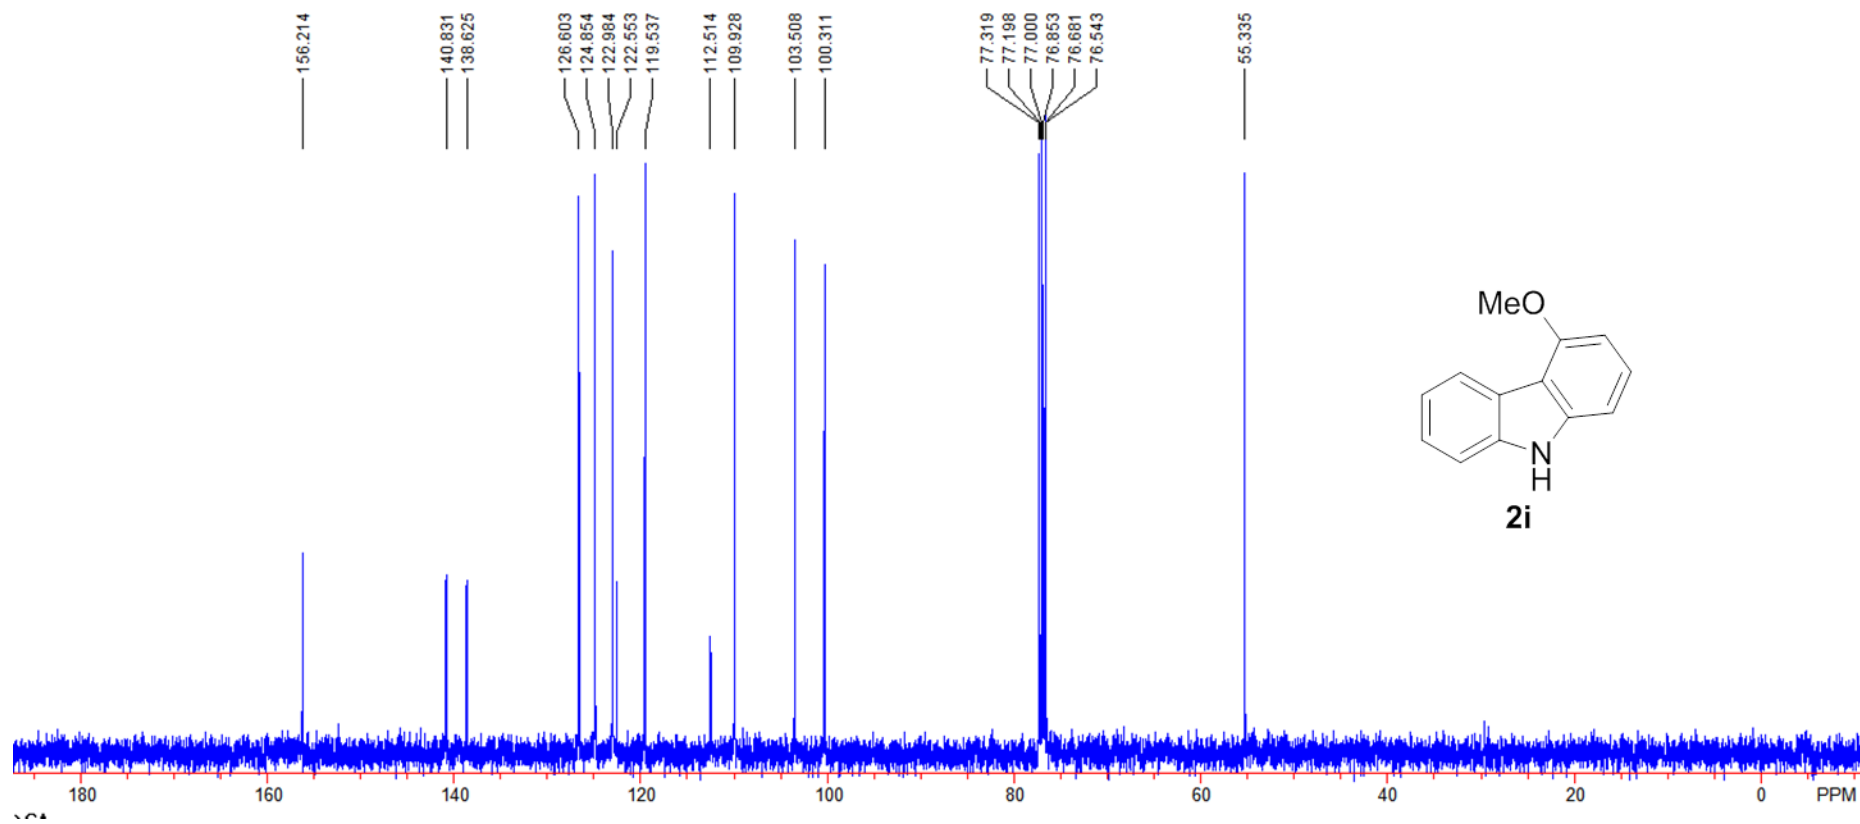

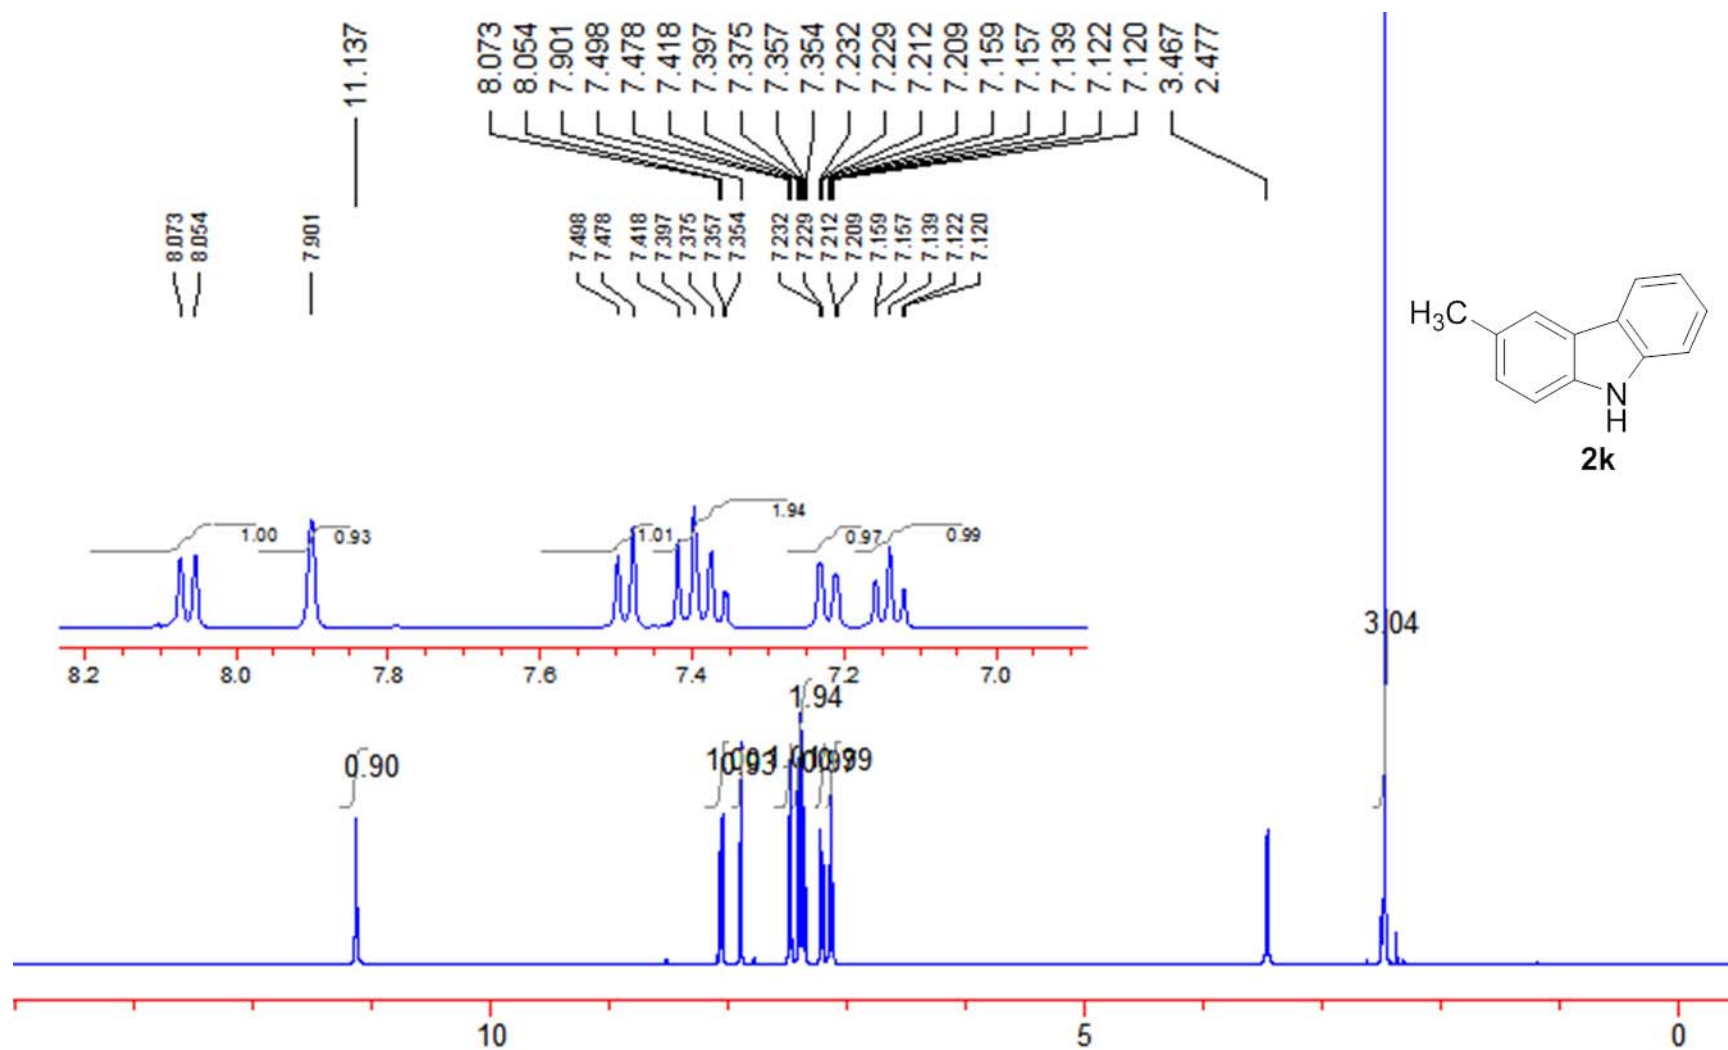

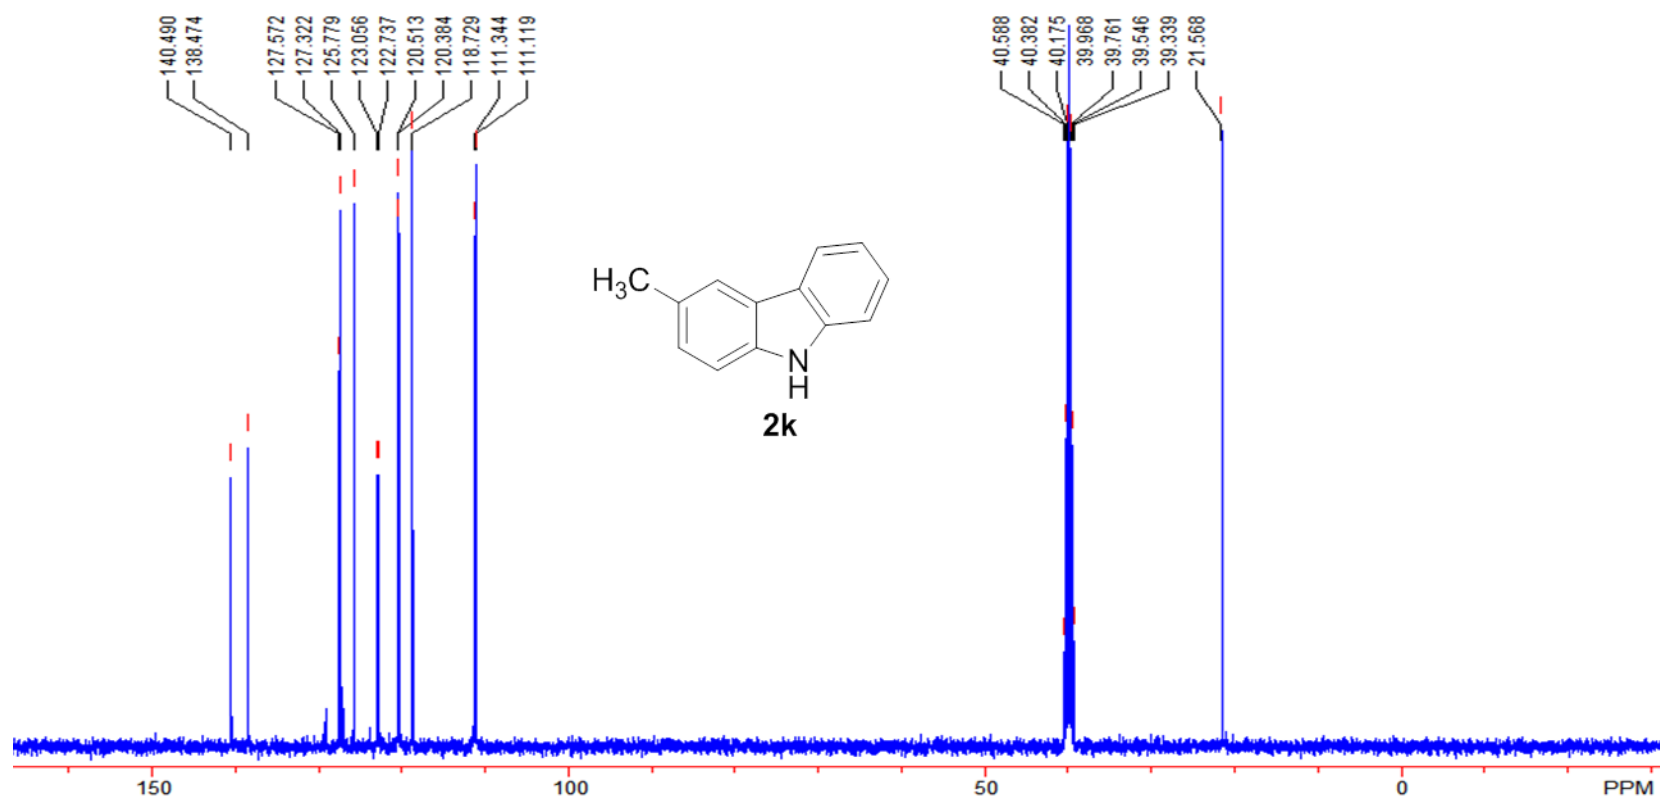



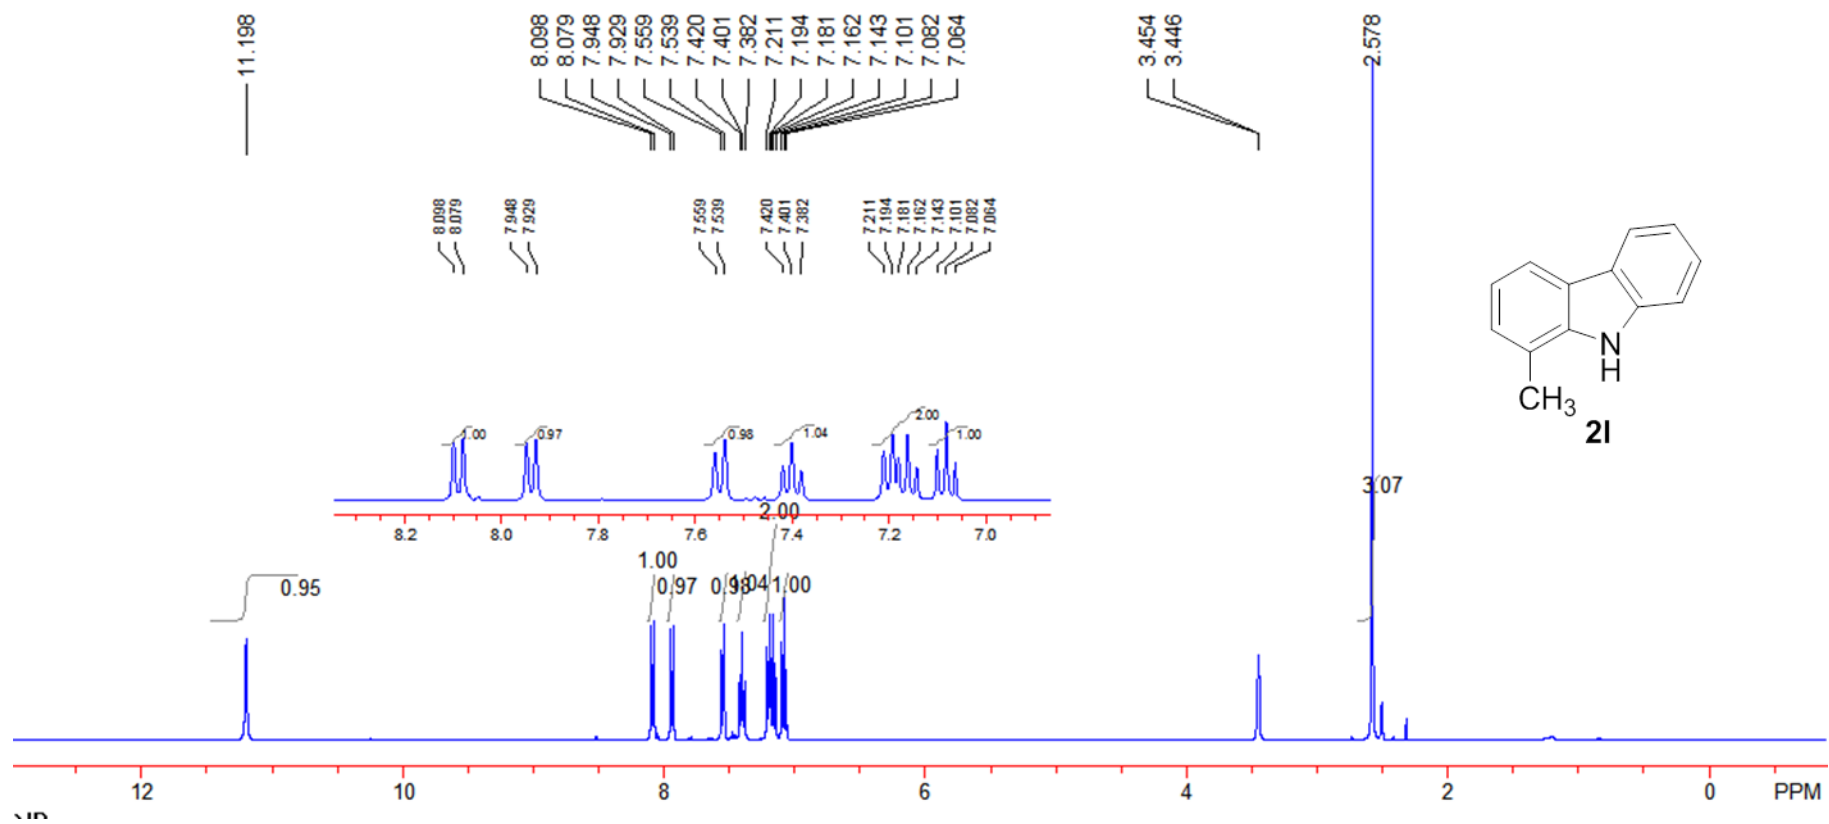

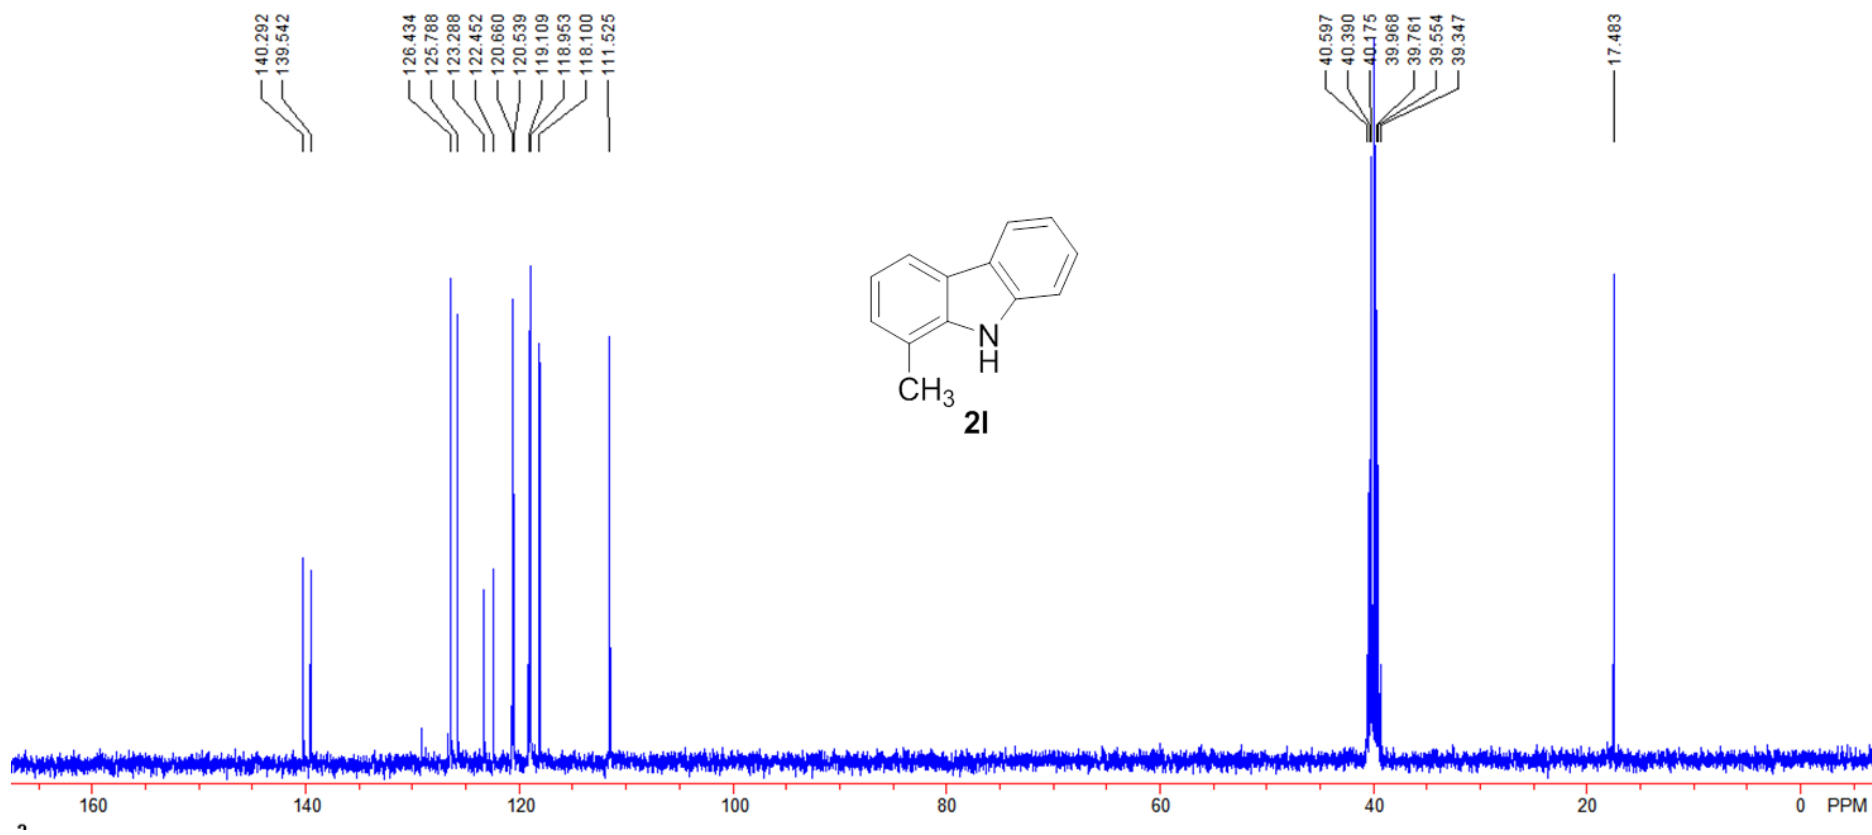

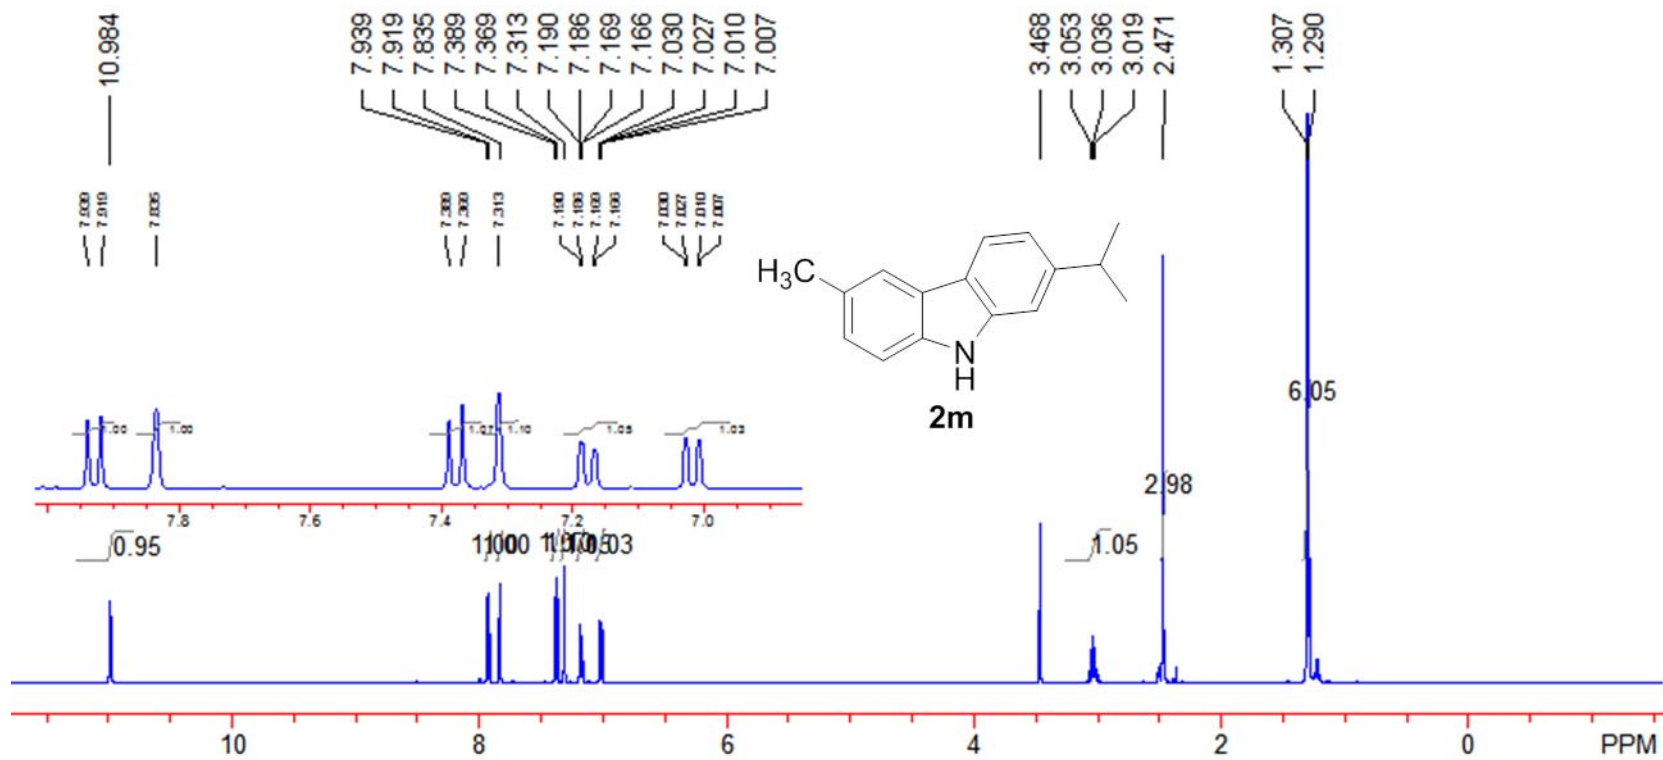

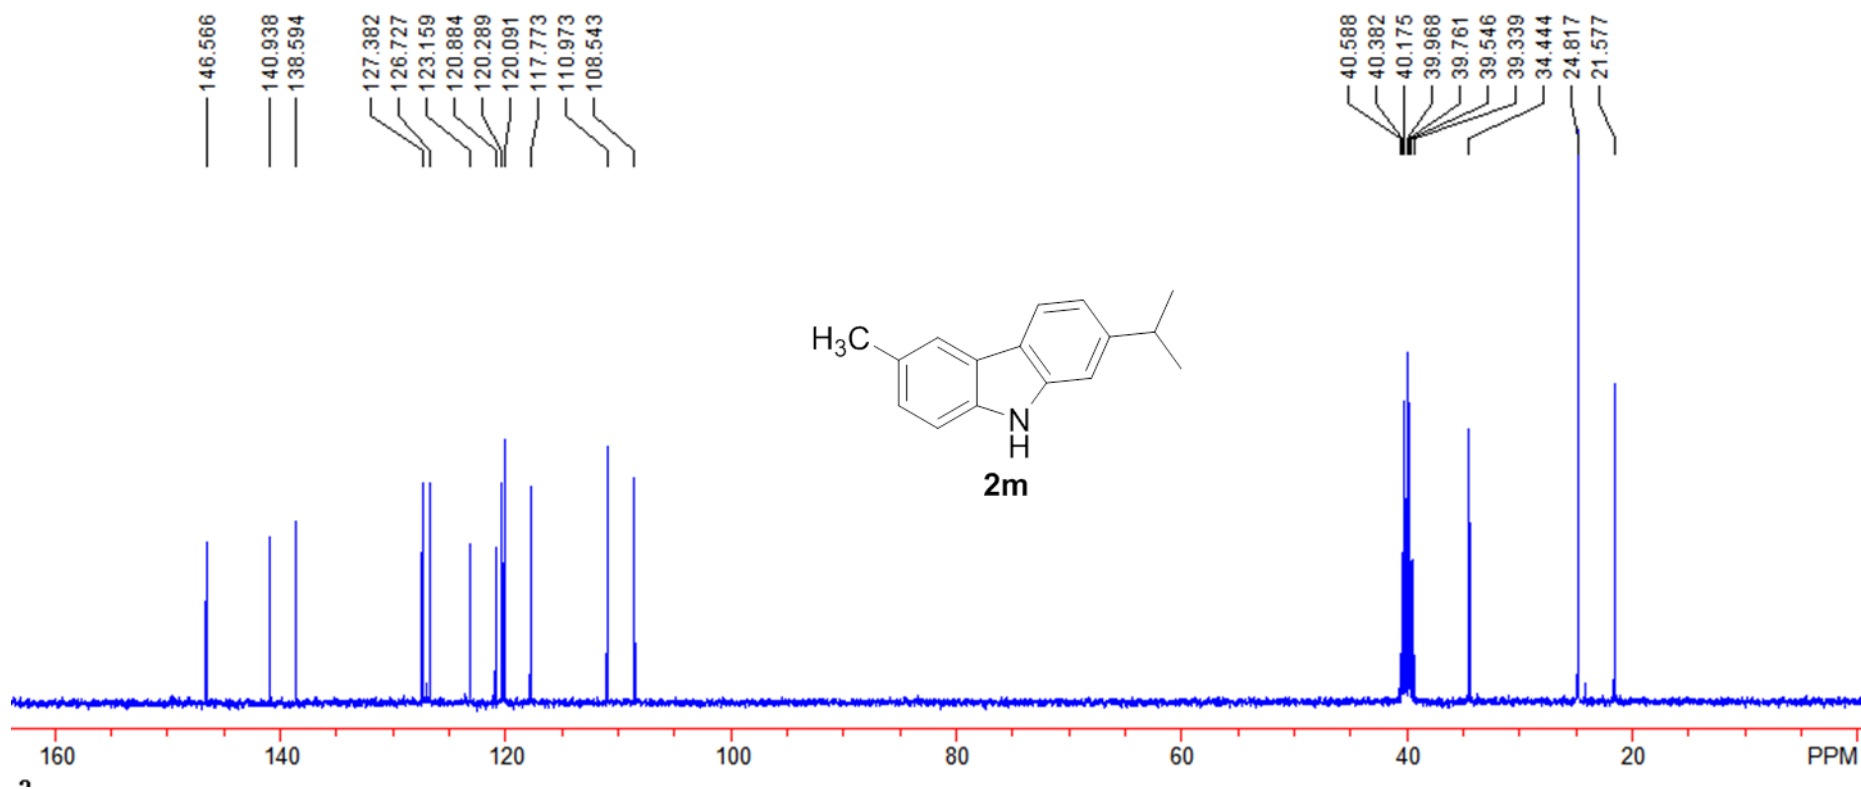

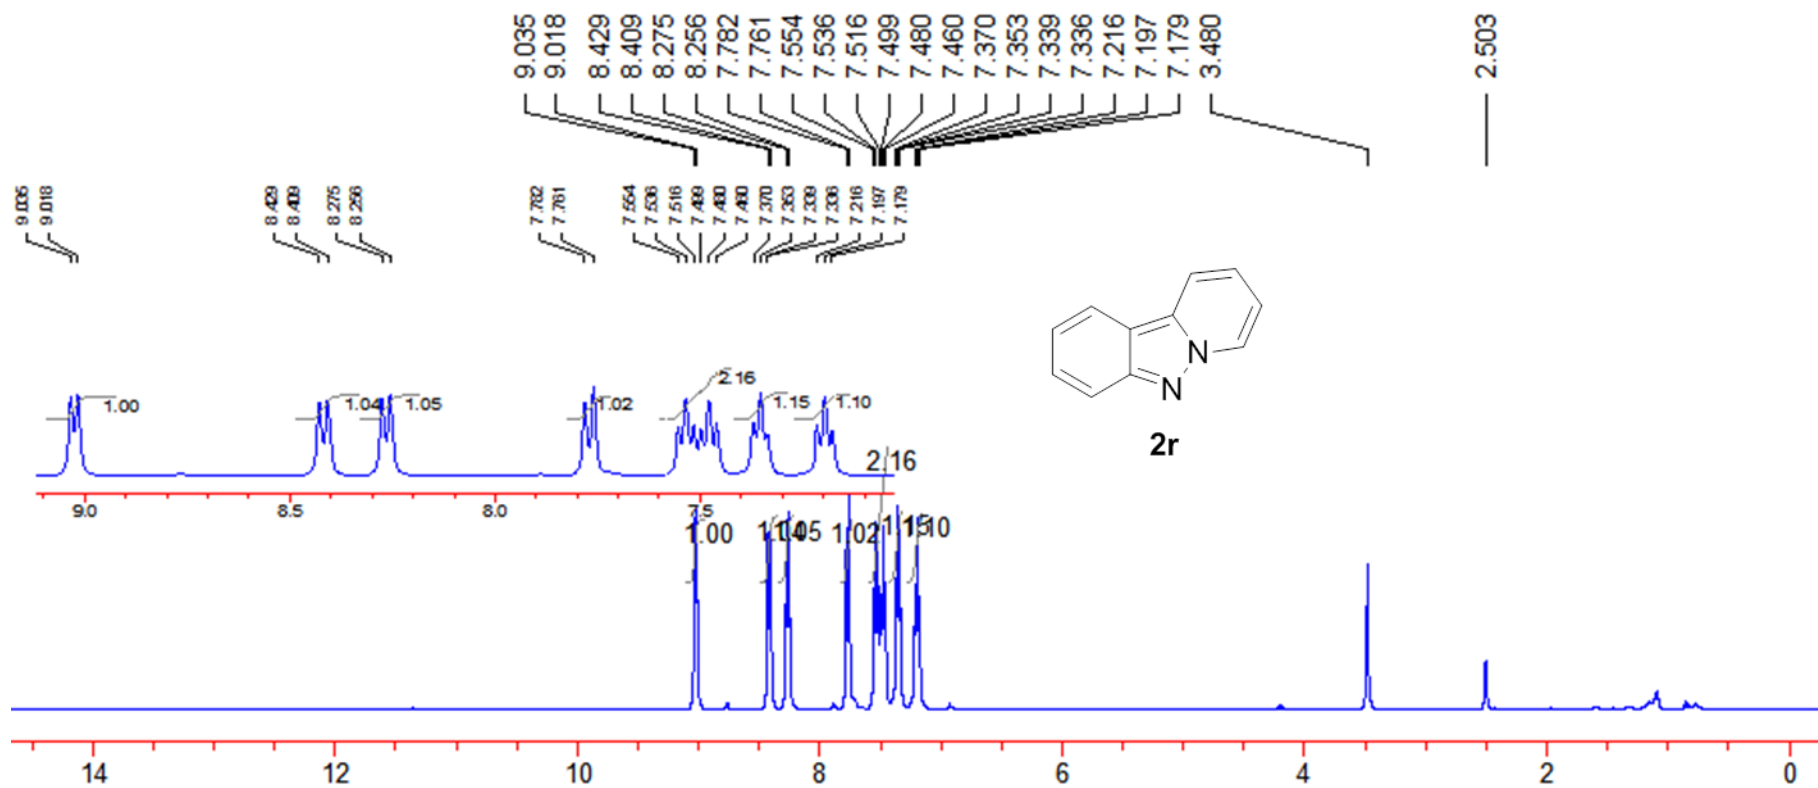

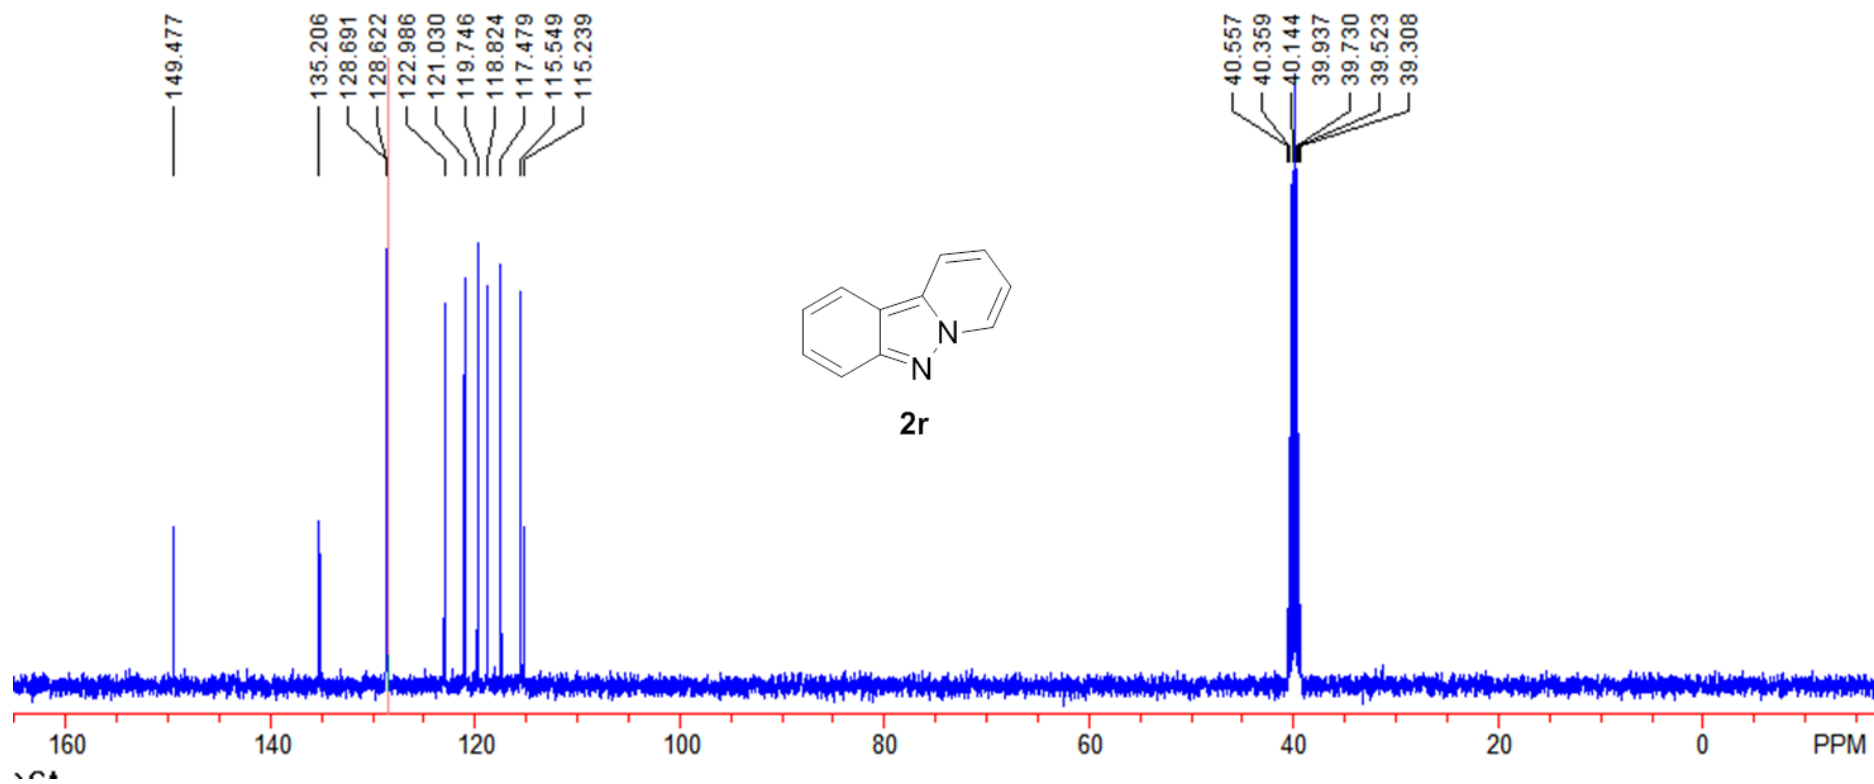

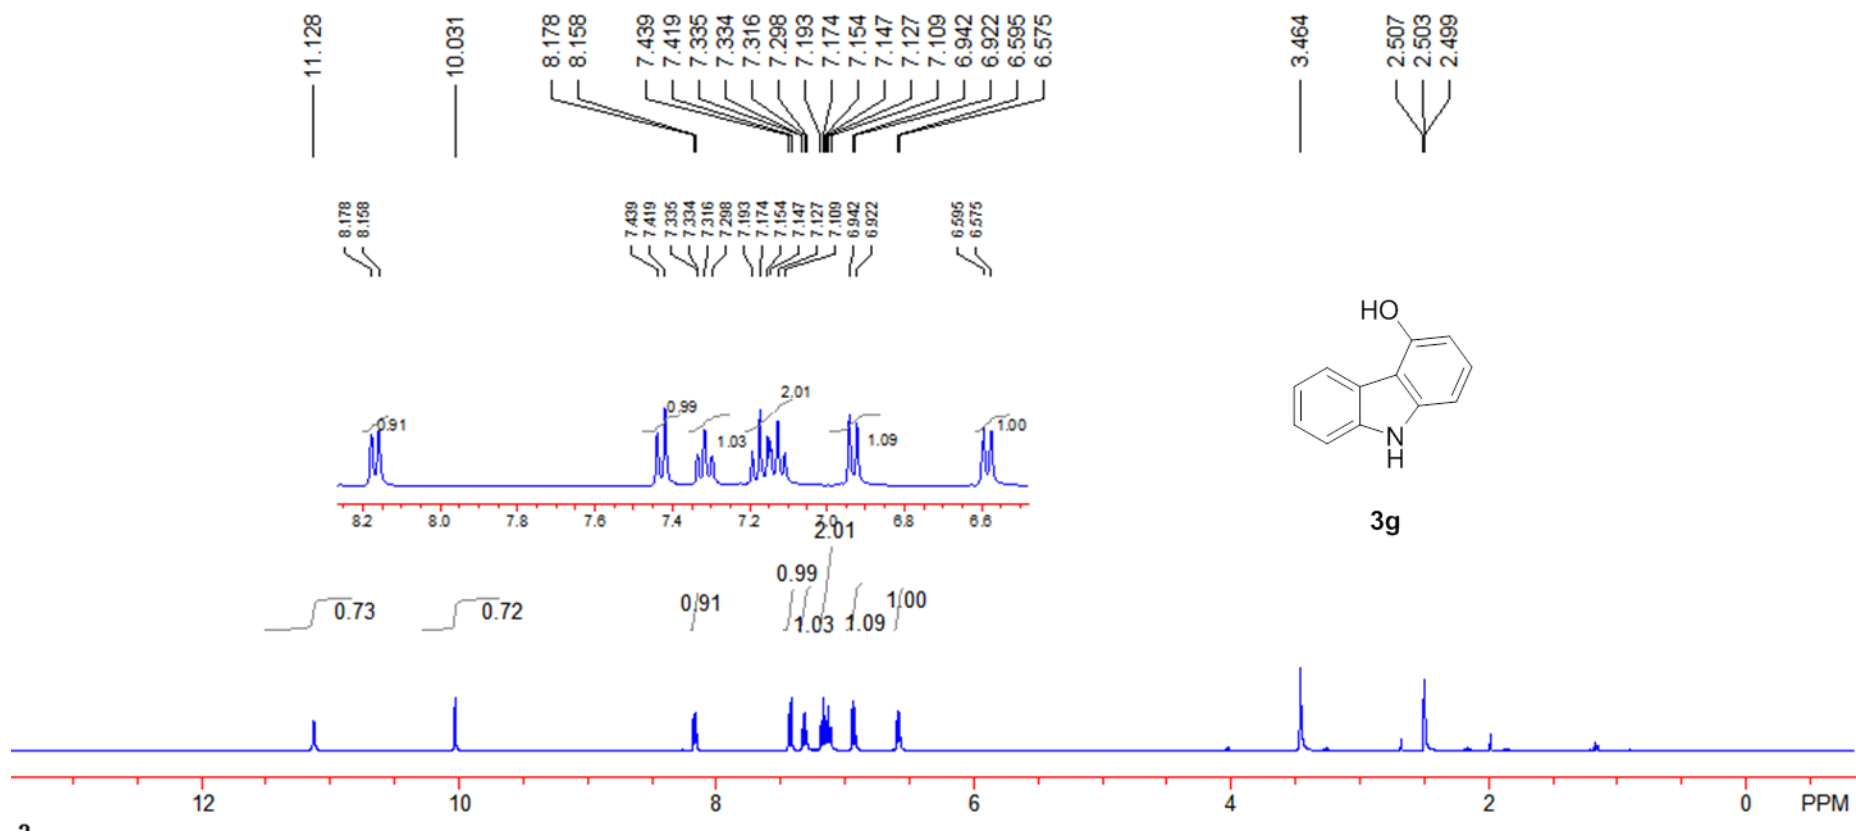

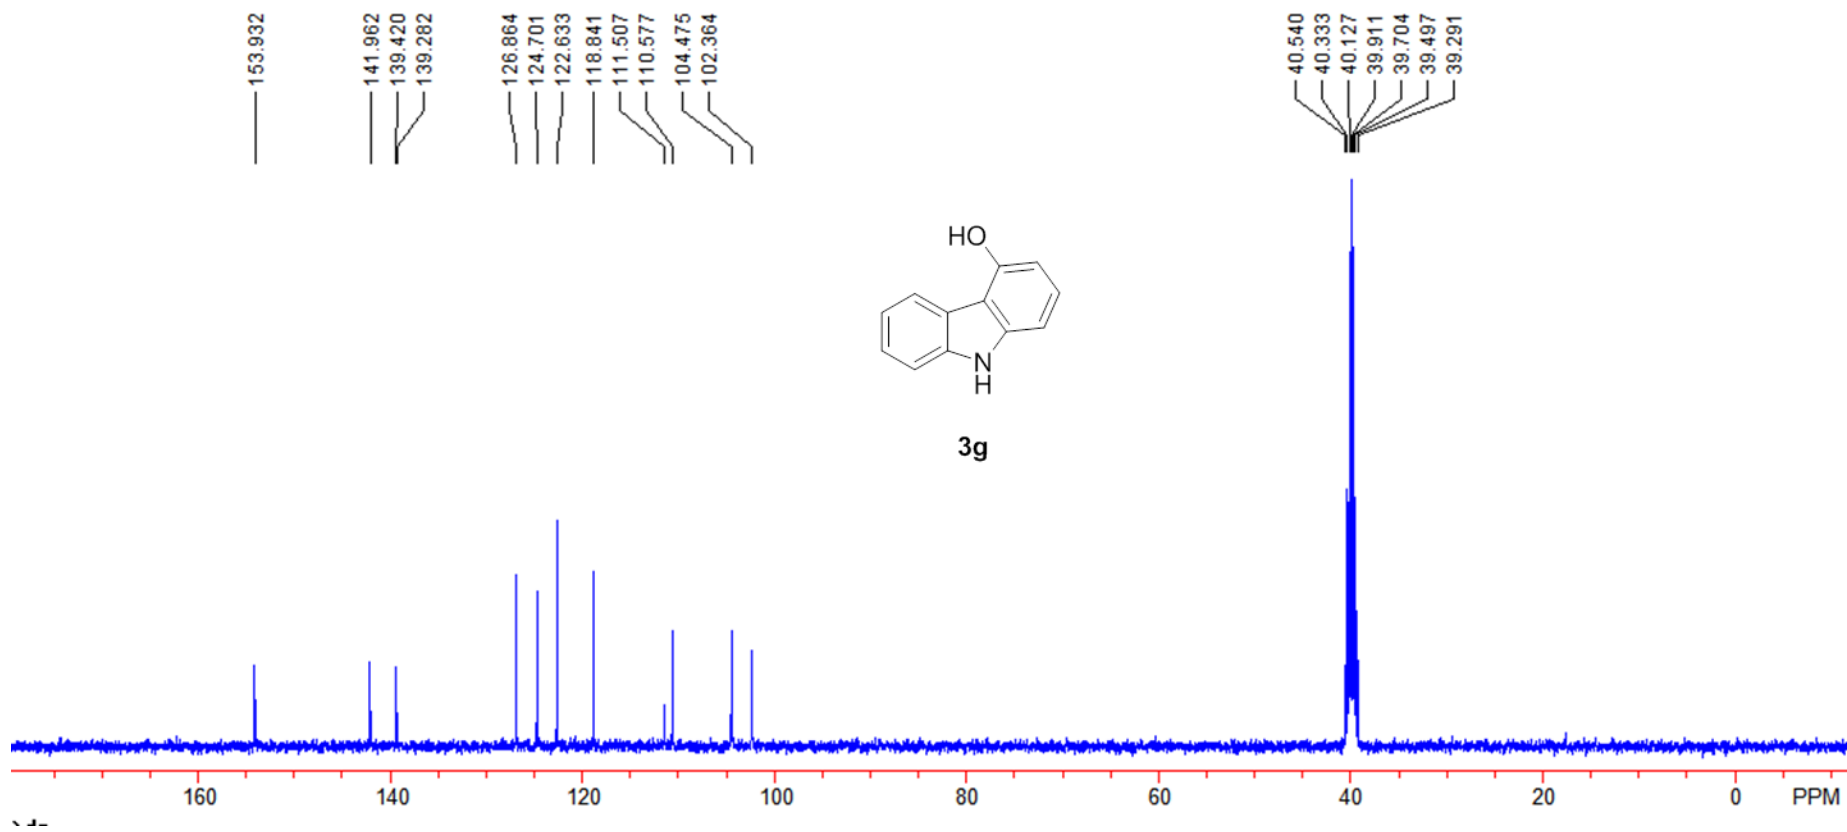

Supplement: c3cc41443d.pdf [file c3cc41443d.pdf]
